# Supplementary material
Source: Research Square preprint supplement (doi:10.21203/rs.3.rs-9932397/v1)

Uncut western blot membranes

Proximal tubule–intrinsic  
complement shapes epithelial  
stress responses in  
rhabdomyolysis-induced acute  
kidney injury

Anne Grunenwald, et al

## Cell fractionation Caki-1

Total lysate    Cytosolic fraction    Organelles fraction    Nuclear fraction    Total lysate2    Purified C3

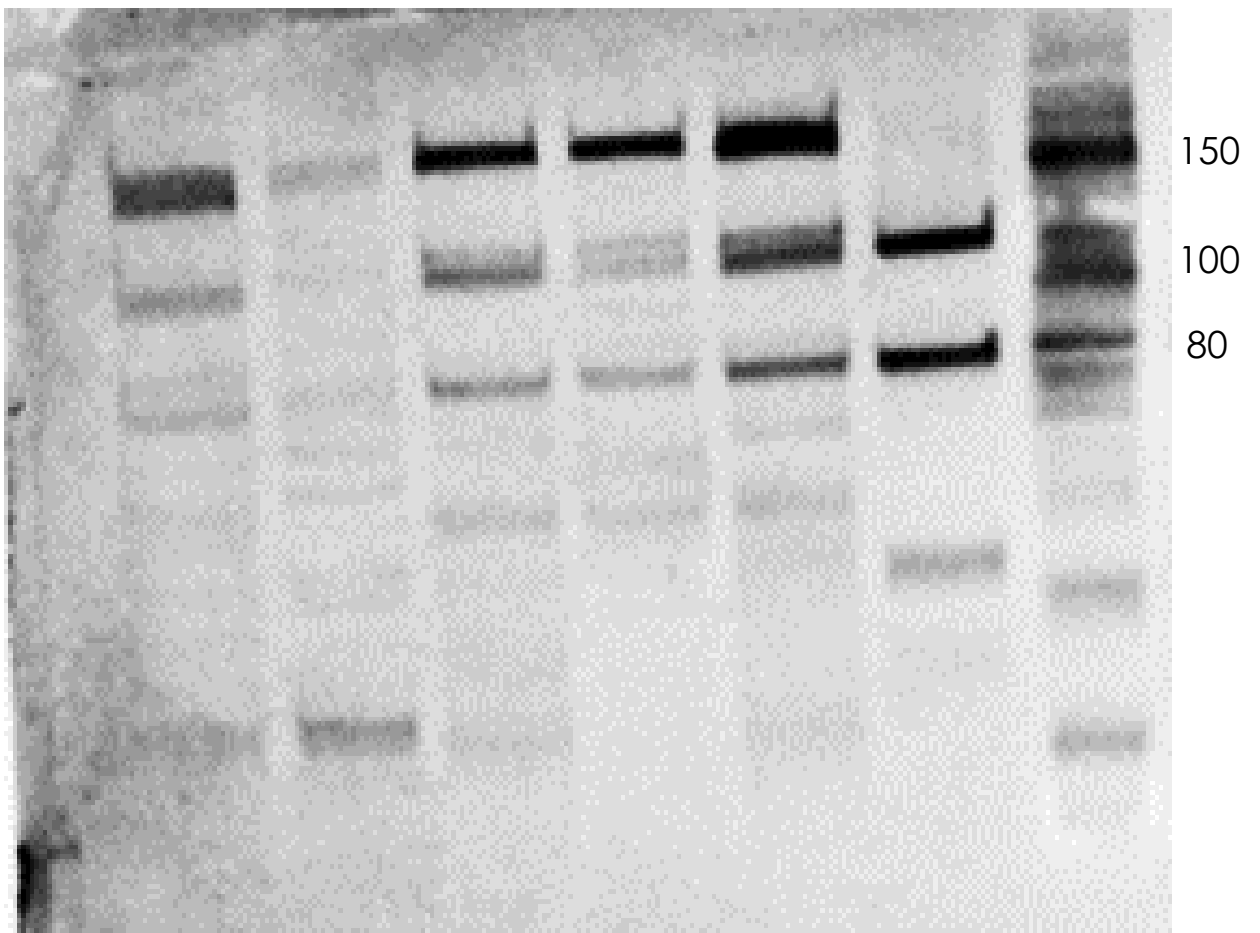

The validation of the purity of the fractions is previously published at Rezola Artero et al, Communications Biology, 2026

# HK2 fractionation

C3 C3b iC3b

Total lysate  
Cytosolic fraction  
Organelles fraction  
Nuclear fraction

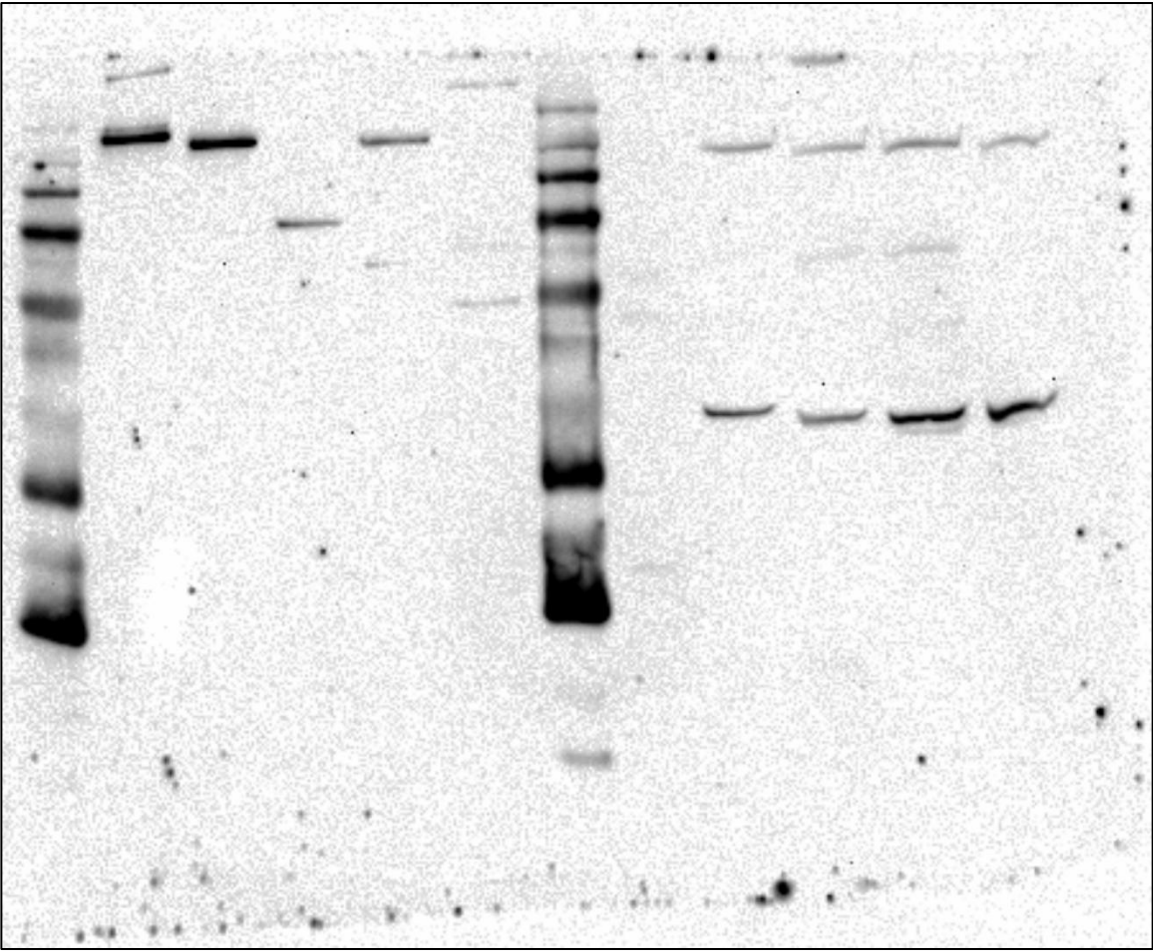

### Caki-1 – anti-C3d

siC

siC3

150 kDa

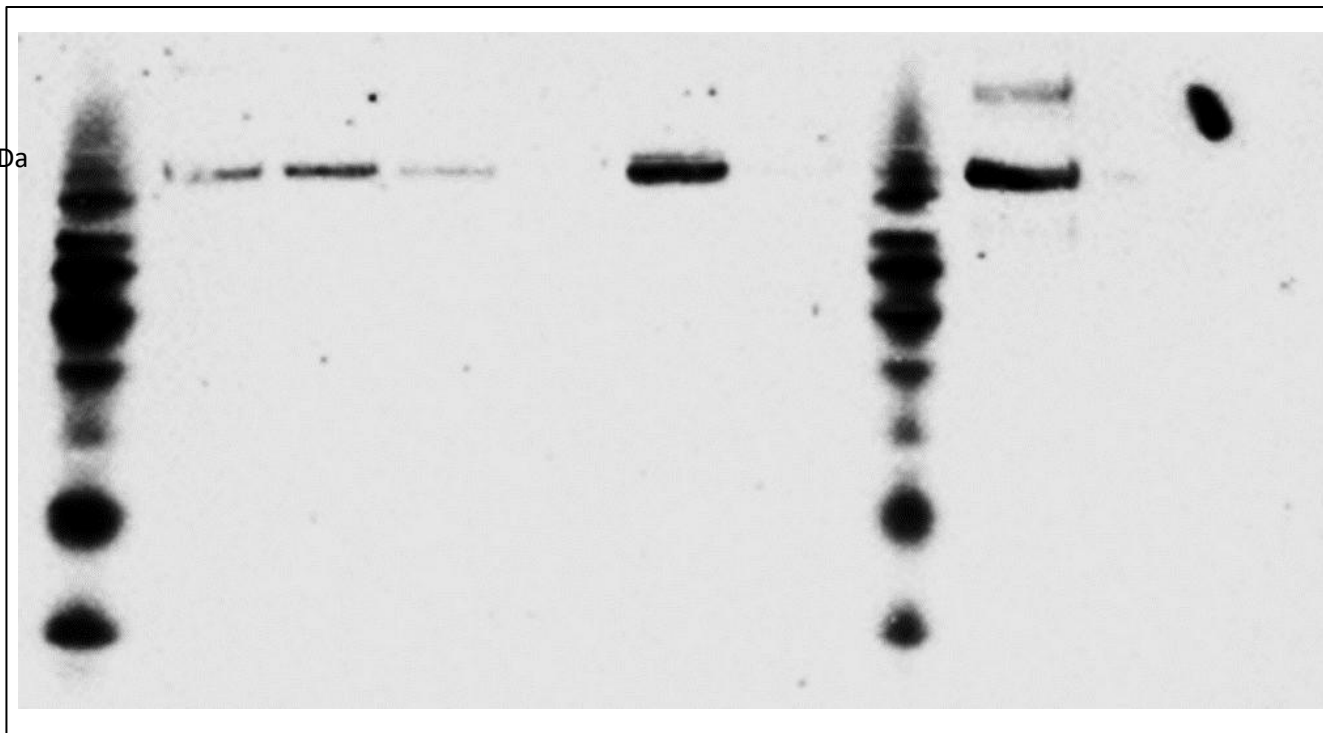

### HK2 – C3 – anti-C3d

siC

siC3

150 kDa

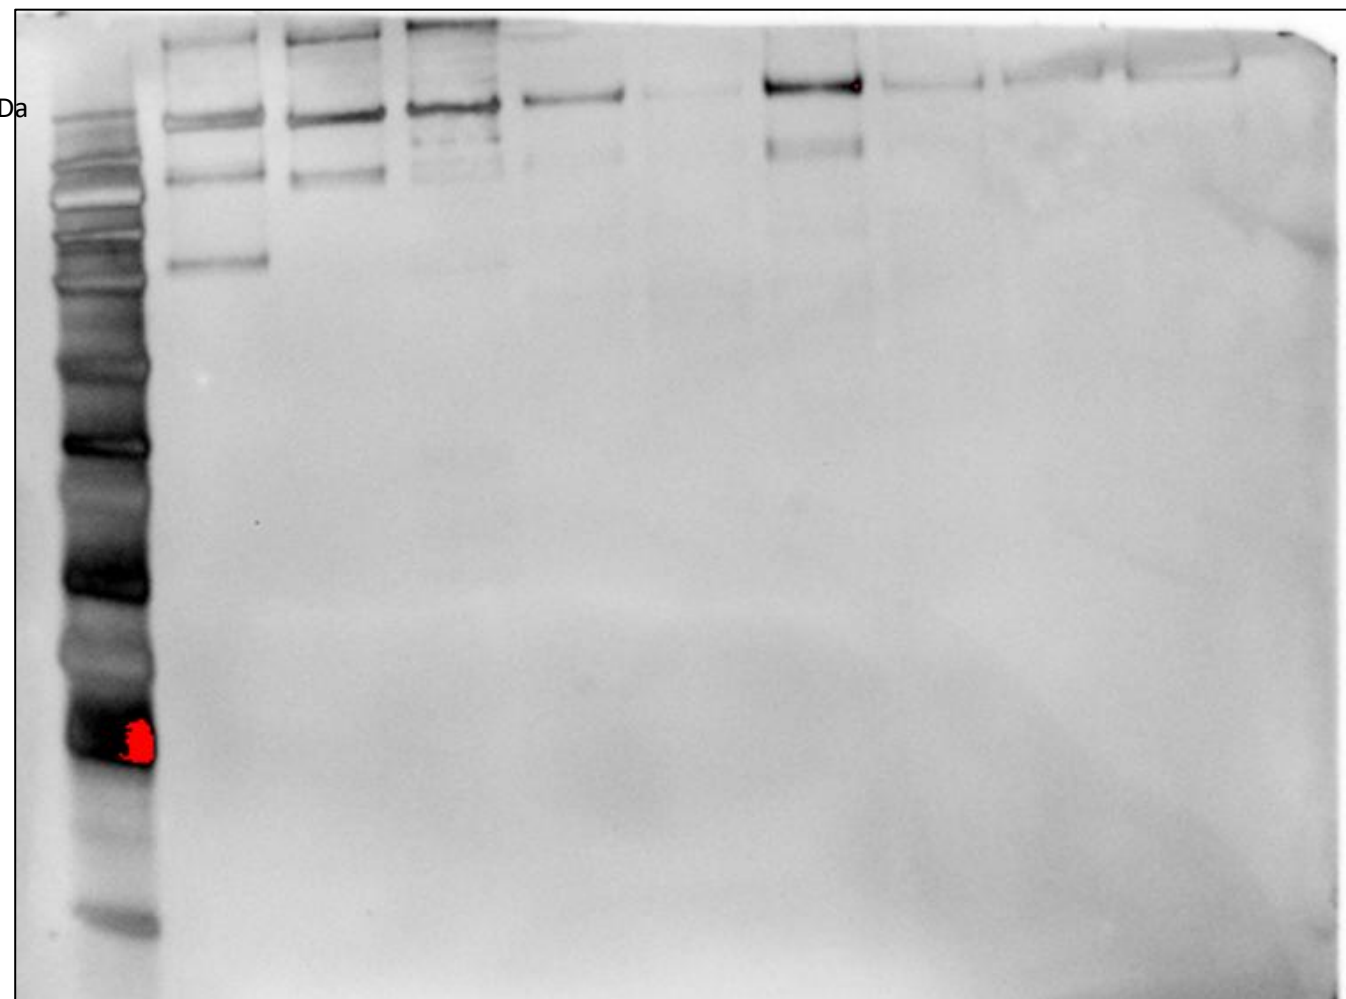

# Caki-1 – polyclonal anti-FB

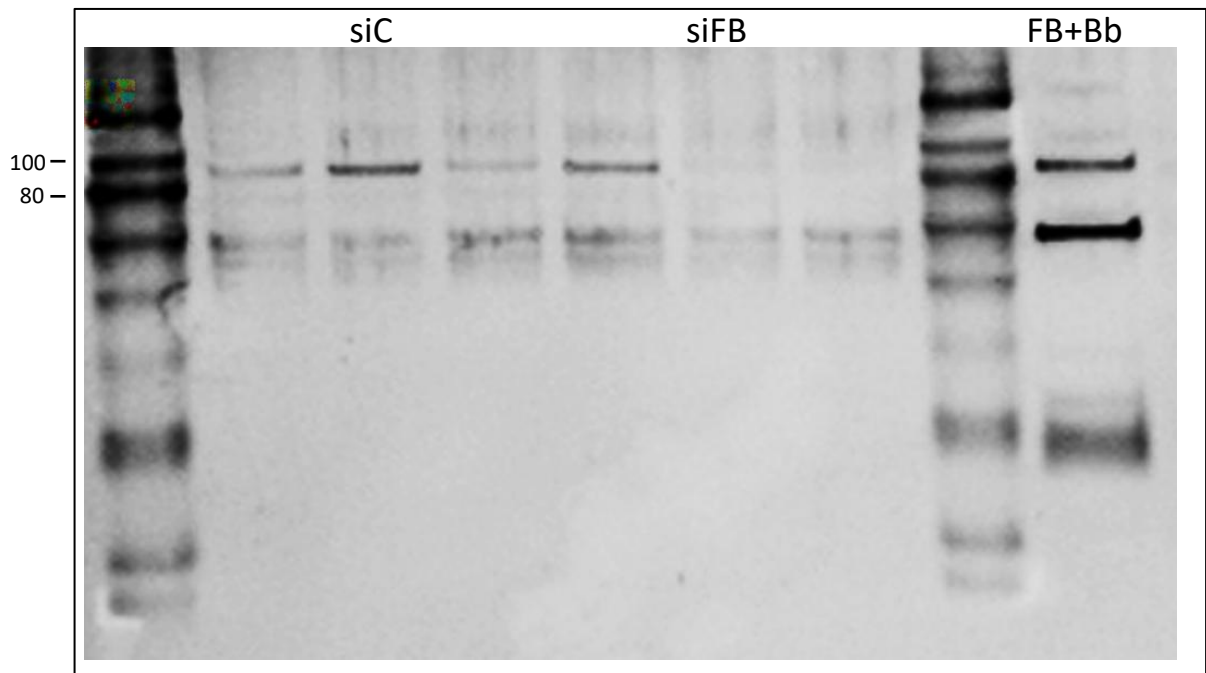

# Caki-1 cells

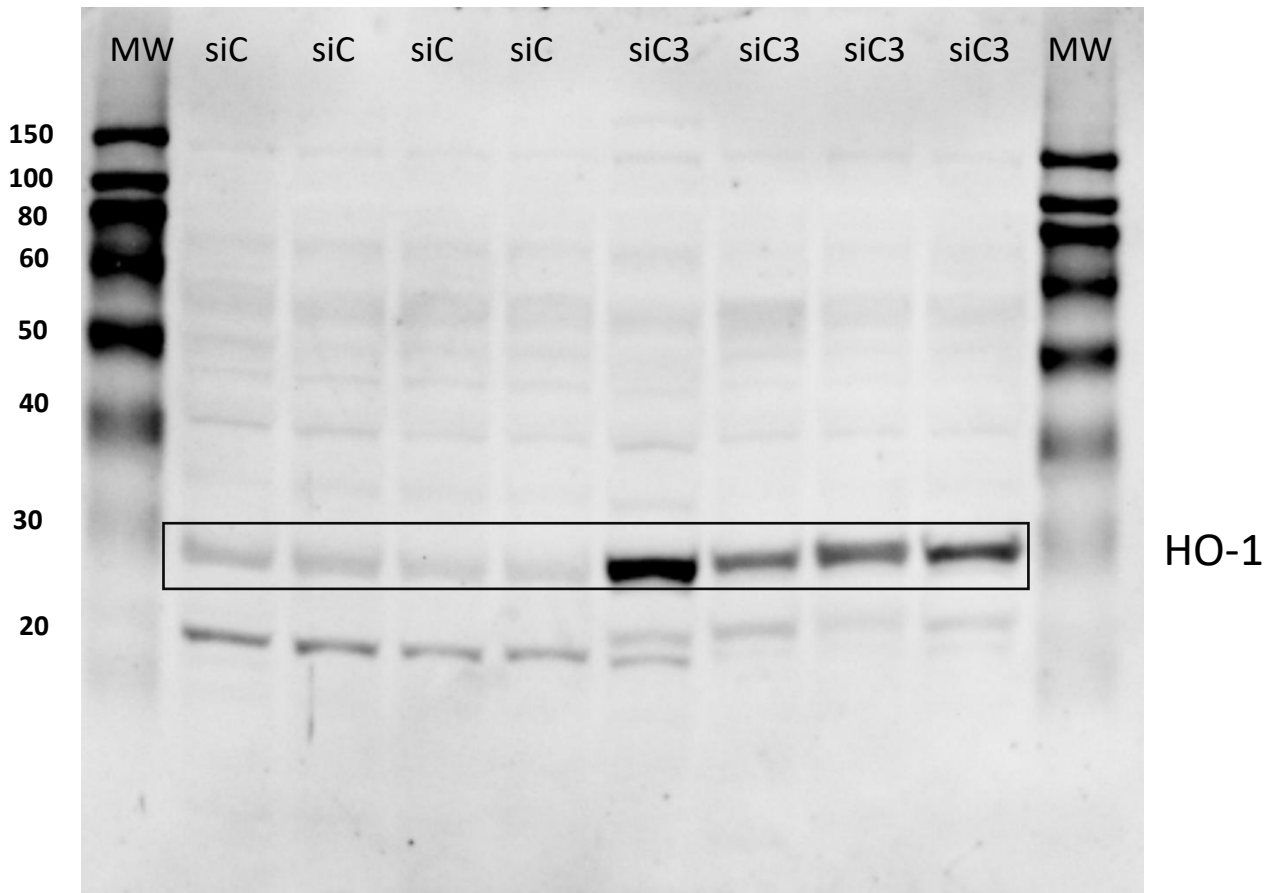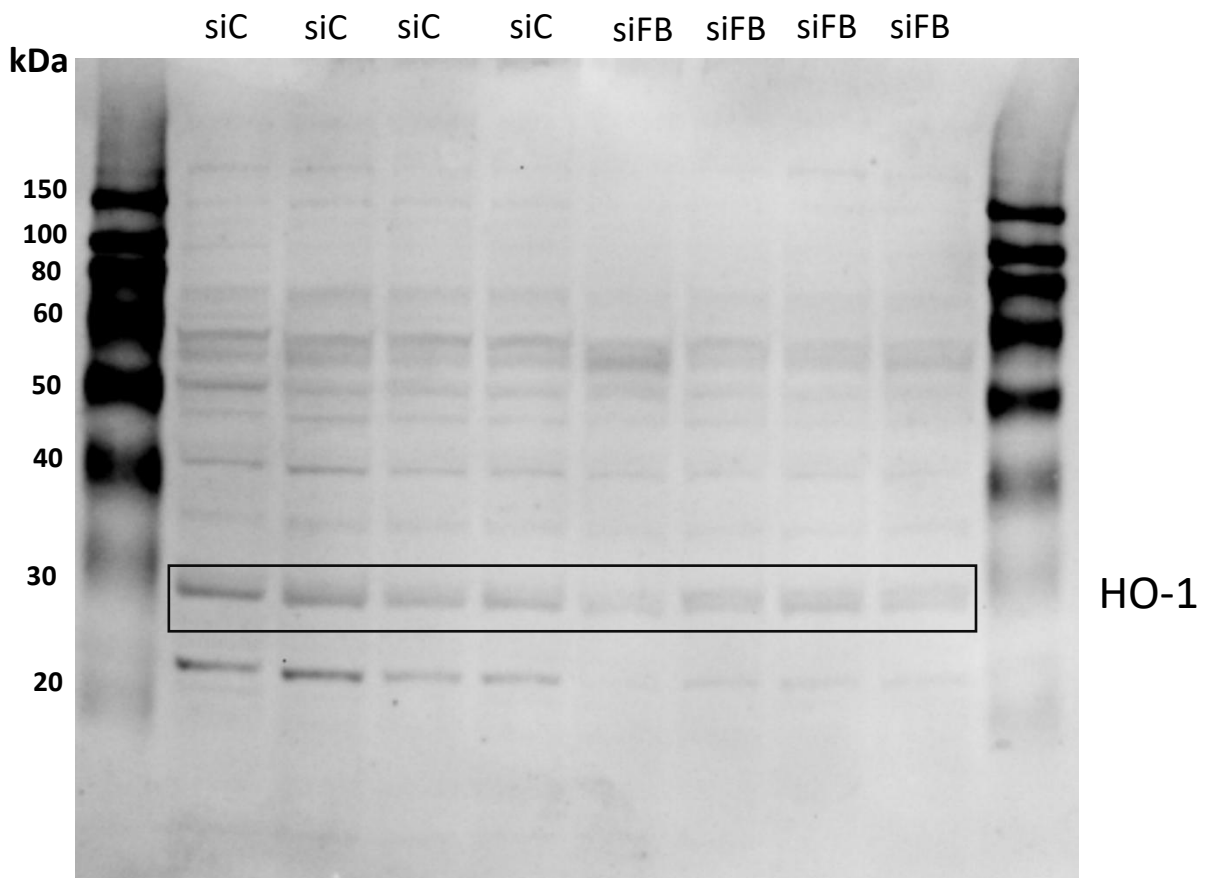

# Phospho-AKT and corresponding actin

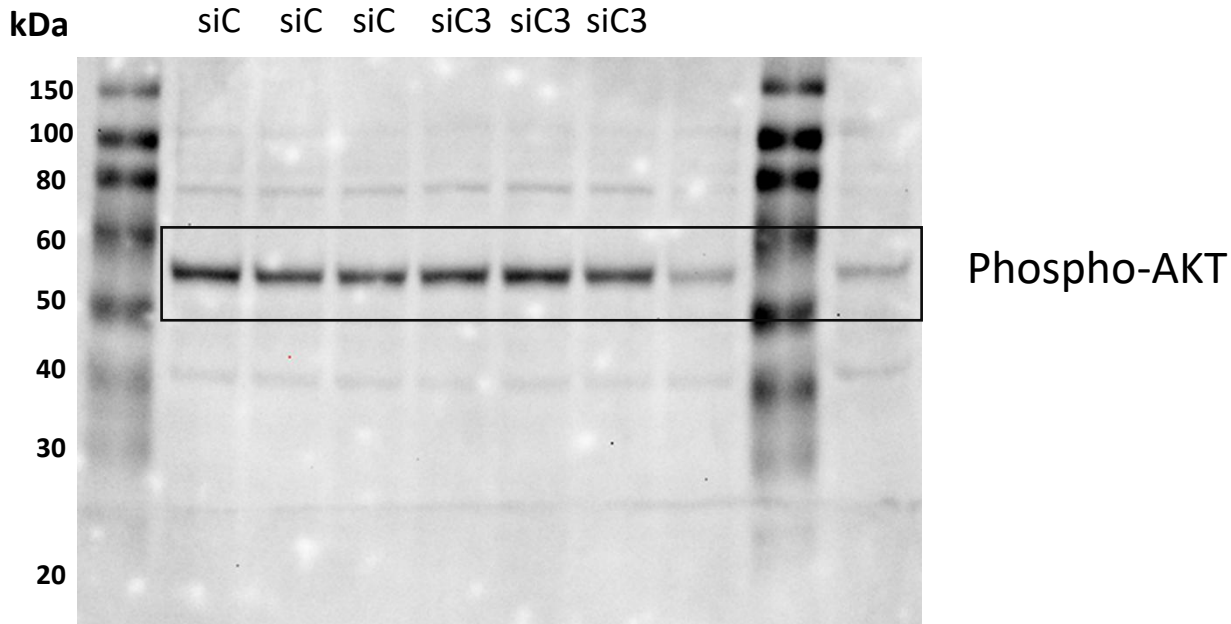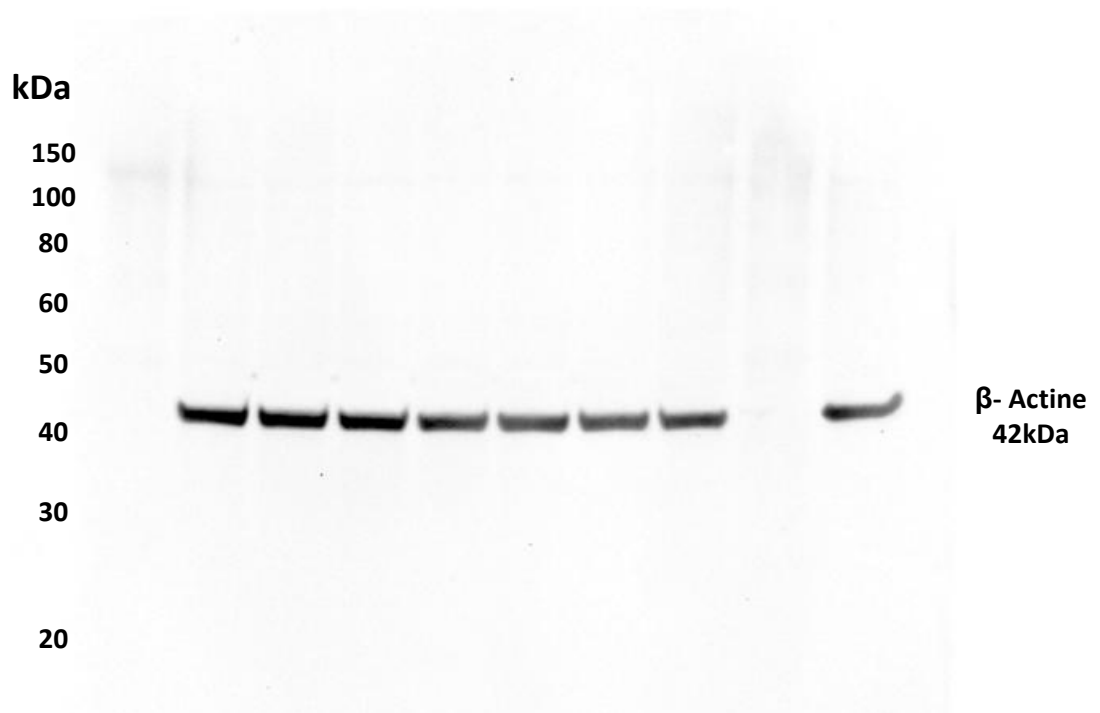



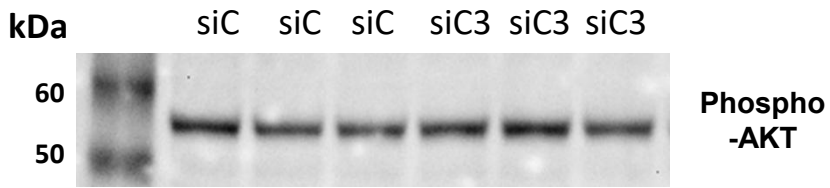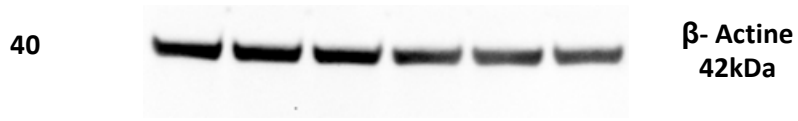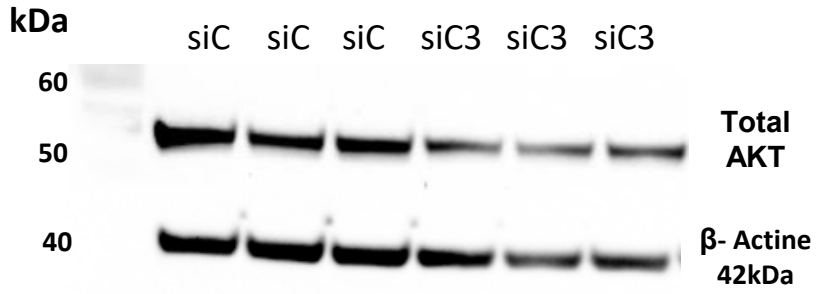

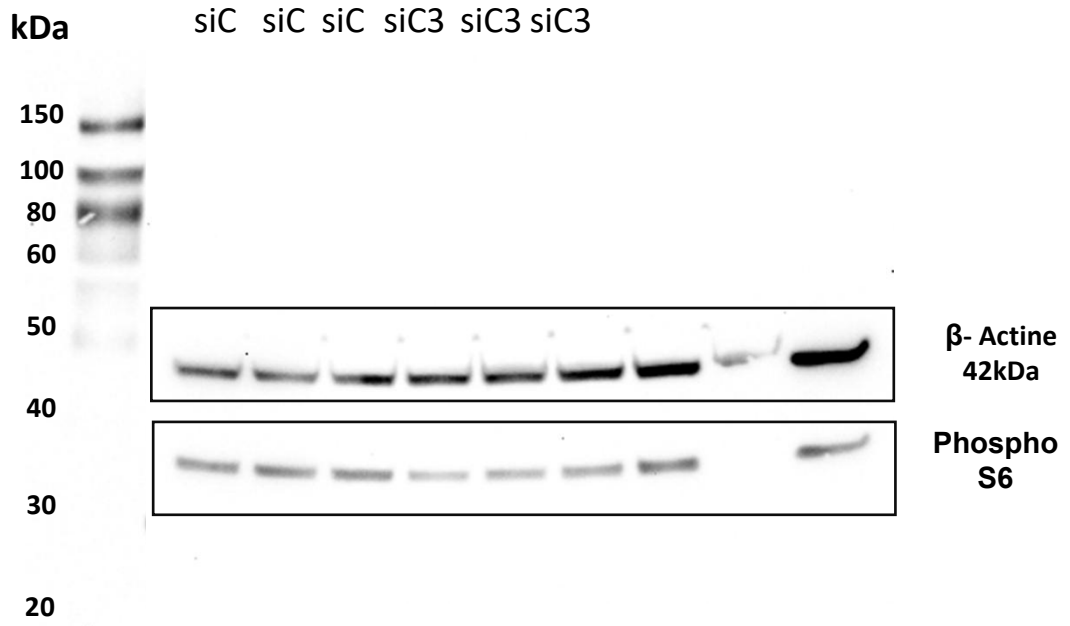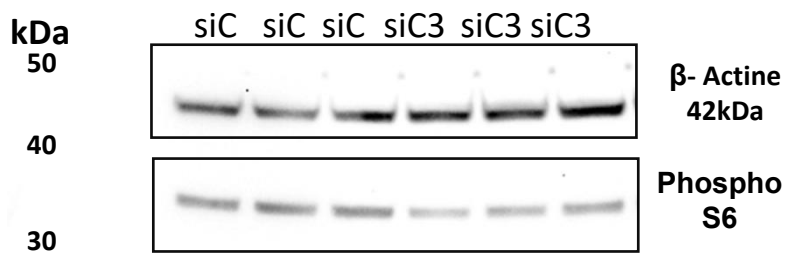

Supplement: Supplementary file 3 [file fc5214220062c954e41f6f69.pdf]
