# Supplementary material
Source: Research Square preprint supplement (doi:10.21203/rs.3.rs-9932397/v1)
Supplement: Supplementary file 1 [file 5c25793855f180c640baf813.xlsx]

## Sheet: Commonly downregulated DE
Caki-1.siC3	Caki-1.siC3...HK2.siC3	Caki-1.siFB	Caki-1.siFB...Caki-1.siC3	Caki-1.siFB...Caki-1.siC3...HK2.siC3	Caki-1.siFB...C3-/- Gly......Caki-1.siC3...C3-/- PBS...	Caki-1.siFB...C3-/- Gly......C3-/- PBS...	Caki-1.siFB...HK2.siC3	Cfb-/- Gly...	Cfb-/- Gly......Caki-1.siC3	Cfb-/- Gly......Caki-1.siFB	Cfb-/- Gly......Caki-1.siFB...Caki-1.siC3	Cfb-/- Gly......Caki-1.siFB...C3-/- Gly......Caki-1.siC3...C3-/- PBS...	Cfb-/- Gly......Caki-1.siFB...C3-/- Gly......HK2.siC3...C3-/- PBS...	Cfb-/- Gly......Caki-1.siFB...C3-/- Gly......C3-/- PBS...	Cfb-/- Gly......C3-/- Gly......Caki-1.siC3...C3-/- PBS...	Cfb-/- Gly......C3-/- Gly......HK2.siC3...C3-/- PBS...	Cfb-/- Gly......C3-/- Gly......C3-/- PBS...	Cfb-/- Gly......HK2.siC3	C3-/- Gly......Caki-1.siC3...C3-/- PBS...	C3-/- Gly......HK2.siC3...C3-/- PBS...	C3-/- Gly......C3-/- PBS...	HK2.siC3
A1CF	AK7	A2M.AS1	ADD2	ARPIN	GBP4	BUB1	ACVR2B	ACAT2	ARMCX4	ADORA2A	CSF3	COL6A3	EGR3	CDKN3	BDKRB2	CRLF1	ACSBG1	UNC5A	ADAM11	MYO7A	ABRACL	ABHD14A
ABCA3	ARL2	AADAT	AKR1C2	MATN3	IL6	CASP4	EIF1B.AS1	ACOT1	C3	ASNS	ETV4	ISG20		CLEC4E	DCLK1	DHRS9	ACTN1		ADAM23	PCSK9	ACOD1	ACTBP11
ABI3BP	CEACAM19	AASS	ARHGAP30		KIAA1549L	CCNA2	NR4A1	ACP1	CX3CL1	ASPM	SLC7A1			CXCL1	GPM6B	RTN4RL2	ADAM12		APOLD1		ACSL5	ALDH1A3
ABR	EBF4	ABCA1	ARL6IP6			CDCA8	SLC17A3	ADA	DENND2A	ATF4				DBF4	HMGA1	SOX9	ADAM19		ATP10A		ADAM28	ANKRD2
ADAMTS18	IGFBP7	ABCA10	ASF1B			CENPK		ADAMTS14	FNDC4	B4GALNT1				DDIT4	NRCAM		ADAM8		CD276		ADAMTS12	ATOH8
ADAMTSL3	PA2G4P4	ABCB10	BEND4			CKAP2L		ADGRA1	HILPDA	CCL5				FGF2	PDGFB		ADAMTS1		CFAP43		ADAMTS2	CDH1
ADCY3	PPP1R3F	ABCB4	BNC1			CLEC2D		ADGRG3	IQCK	CEP55				FGG	SH3BP2		ADAMTS4		FAM131C		ADCYAP1R1	CDHR1
ADGRE2	RPS6KA3	ABCC13	C5			COL5A2		ADORA2B	LOXL3	CFP				FUT1	TGFB1		AKAP12		GPR161		ADGRG6	CLDN2
AFF3	TMUB1	ACAA2	CCDC138			DEPDC1		AEN	LRP8	CHSY3				IL1B			AKR1B10		MAMLD1		ADGRL2	CNTNAP3C
AGBL3		ACBD7	CCNA1			ESCO2		AIF1	MARCKSL1	CKS1B				IL24			ALDH1A2		MAP4K4		AIM2	CYS1
AK4		ACOT11	CD69			FANCI		AJUBA	MT1A	DDIT3				LCN2			AMMECR1		PRRX1		AMDHD1	ERVK9.11
AK5		ACSS3	CDC25C			KCNT2		ALDH18A1	MT1X	DIAPH3				LOX			ANGPTL4		SCARA3		ANKRD65	F2
AK8		ADAMTS9	CDT1			KIF11		ALG8	PLOD3	EMILIN2				MBOAT1			ANKRD1		SEMA6B		ANXA1	FAM66B
AKR7L		ADAP1	CERS1			KIF18B		ALOXE3	SLC39A1	GTSE1				PLEK			ANXA2				ANXA5	FBLN7
ANKRD18B		ADIRF.AS1	CLIP2			KIF4A		AMPD3	TSPAN4	JUNB				PLSCR1			ARID5A				ANXA8	FPGT.TNNI3K
ARF5		ADM2	CNRIP1			MELK		ANXA3	TUBB4A	KCNJ14				RCAN1			ARL4C				APOBEC2	GAL3ST1
ARHGEF26		AGPAT3	CSF2			MKI67		AOC1	UNG	LRFN4				RGS2			ARPC1B				ARHGAP15	GLP2R
ARHGEF6		AHCTF1	DBNDD2			MYADM		APBB1IP	ZBTB42	NR4A3				SIRPB1			B3GALT1				ARHGAP20	GPR87
ARL2BP		AHCTF1P1	DHRS3			NLRP3		APCS		OAS2				SLC25A24			BAZ1A				ARHGEF19	HYDIN2
ARMC3		AHI1.DT	ECHDC3			NUF2		APEX1		PDK4				SLFN11			BCL2A1				ARL6IP1	IFITM1
ARNT2		AICDA	EFNB3			PBK		APOBEC3B		PHLDA1				SMOX			BIN2				ARSJ	IGFBP3
AS3MT		AKNA	EIF4E3			PCLAF		APOC2		PLK4				SUV39H2			BIRC3				ASPRV1	JAG1
ASIC1		ALDH1L2	ELAPOR2			PMAIP1		AQP9		PPP1R15A							BTBD17				B4GALT5	KDF1
ATL3		ALG10B	EXPH5			SGO2		ARHGEF4		PTGS2							C5AR1				BAALC	KRCC1
ATP6V0D1.DT		ALMS1	FBXL19.AS1			SKA3		ARHGEF40		RAB31							CA13				BARX2	LARGE2
ATP6V0E2.AS1		ALMS1.IT1	FBXO36			SNHG3		ATF3		RAPH1							CAMK2B				BBS7	LHFPL3.AS2
B4GALNT2		AMMECR1L	FIBCD1			STIL		ATF5		REL							CARD14				BMP2	LHX2
B4GALNT4		AMN1	FMNL1.DT			TNFAIP6		ATP1A4		RESF1							CCL15				BMPER	LIMCH1
B4GALT2		ANKH	FOXC2			TOP2A		BAG2		SEMA4C							CCL17				BTLA	LINC00410
BACE1		ANKRD36	FOXD2.AS1			TRIM59		BAK1		SLC38A1							CCL2				C21orf91	LINC02532
BACE2		ANKRD36B	FXYD6			TRIP13		BASP1		SLC39A6							CCL20				C4A	LINGO2
BACH2		ANKRD36BP2	GNAZ			TTK		BATF2		SLC7A11							CCL7				C5AR2	LLGL2
BAIAP2L2		ANXA11	GTF2F1			VCAM1		BCL3		TPX2							CD14				C7	LMF1
BBOF1		AP1S2	HCCS.DT			VGLL3		BPIFC		TRIB3							CD24				CACNA2D1	LMNTD2.AS1
BCDIN3D.AS1		AREG	HMGN2P46			ZC3H12D		BSPRY		ULBP1							CD300LB				CADM1	LTB
BCO1		ARG2	ICOSLG			ZDHHC2		BTBD19		ZSWIM4							CD300LF				CALHM5	MARVELD3
BOK		ARHGAP11A	ITGA9.AS1			ZNF117		BZW2									CD44				CALML3	MIAT
BORCS8.MEF2B		ARHGAP11B	ITGB1.DT					C1QTNF6									CD53				CAPN11	MMP11
BRI3BP		ARHGEF2	ITGB3BP					C8orf34									CDC42EP4				CAV3	MMP13
BRSK1		ARHGEF39	KBTBD11					CAD									CDCA7				CCL11	MSI1
BRSK2		ARID3B	KIF14					CAMK2N2									CDH17				CCL21	MYT1
BVES		ARIH2OS	KLHL38					CARD19									CDH3				CCL22	NCKAP5
C13orf46		ARPC5	LDLR					CARHSP1									CDK6				CCL4	NKD2
C16orf74		ASAH2	LIMD2					CCDC120									CEP170				CCN2	NMB
C1QL1		ASB9	LIN7A					CCDC71L									CH25H				CCNB1	NPW
C1QTNF5		ATAD2	LINC01515					CCDC86									CHIA				CCR2	OLMALINC
C21orf58		ATAD5	LINC01521					CCDC88B									CKAP4				CCR5	POLN
C21orf62.AS1		ATP10B	LINC02783					CCN4									CLDN1				CD209	POTEE
C2orf16		ATP2B1.AS1	LRRC49					CCNE1									CLDN4				CD244	PSG8
CACNG6		ATP2C2.AS1	LUCAT1					CD177									CLEC4D				CD80	RAB11FIP4
CACNG7		ATP6V0D2	MEIOC					CD248									CLEC5A				CD86	RPS6KL1
CAMK2N1		ATP9B	MNS1					CD2AP									CLIC1				CDC6	SCART1
CAMK4		AURKA	MTFP1					CD300LD									CLU				CDH11	SCTR.AS1
CASC19		AURKB	NSD2					CD68									COL15A1				CDH2	SEC14L6
CATSPER2		B4GALT4	NTNG2					CDC7									COL1A1				CEMIP	SEMA5B
CBX2		BARD1	OXCT1.AS1					CDIN1									COL1A2				CEP85	SFRP4
CCDC146		BATF3	PHGDH					CDK5R1									COL3A1				CFI	SLC15A2
CCDC74B		BCHE	PITPNC1					CDKN1A									COL4A2				CGAS	SLC17A1
CCDC85A		BCORL1	PNMA2					CDR2L									COL5A1				CHD9	SLC22A1
CDH6		BEX2	POC1A					CEBPB									CREB5				CIP2A	SLC2A4
CDK16		BIRC5	POLE2					CEBPD									CSF3R				CLCA3P	SRR
CDNF		BLM	PRR11					CELSR3									CTSL				CLEC4A	TIMD4
CDYL2		BLMH	PTPRD.AS1					CENPT									CXCL5				CLEC6A	TMSB15A
CELSR2		BORA	R3HDM2					CHAC1									DAPP1				CLEC7A	TRO
CEP41		BRCA1	REXO5					CHRNB1									DOK4				CNDP2	TRPM8
CERCAM		BRD3	RFLNB					CIMAP2									DOK5				CNIH1	TSHZ1
CERK		BTBD8	RNGTT					CLCF1									DPEP2				CNN1	UGT1A6
CERS6		BUB1B	RPS6KA5					CLDN14									DPYSL3				COL6A5	UGT1A9
CFAP221		C11orf96	SCIRT					CLDN3									DTX4				COMT	UNC13A
CFAP300		C15orf48	SIGLEC15					CLDN7									DUSP10				CPE	VANGL2
CFAP69		C16orf87	SKA1					CLSPN									DUSP5				CPN1	VAX2
CFAP91		C19orf53	SLAIN1					CNGA3									DUSP8				CPXM2	WIPF1
CHASERR		C1orf112	SLC17A9					COL4A1									DYRK3				CREM	YPEL1
CIBAR1		C1orf147	SLC4A11					COL5A3									EDN1				CSGALNACT1	ZNF710.AS1
COLGALT1		C1orf21	SLC7A11.AS1					CPNE7									EEPD1				CSRP1
CORO2A		C1QTNF1	SOBP					CPNE8									EFHD2				CTSC
CPEB1		C2CD5	ST6GAL1					CRCT1									EFR3B				CTSD
CRACR2B		C3orf80	SYCP2					CRELD2									EGR2				CTXN3
CRIP2		C5orf22	TCAF1					CRISP3									EMILIN1				CXCL17
CSNK2A3		C5orf34	TGFB1I1					CRLF2									EMP2				CXCR2
CTSO		C5orf51	TICRR					CRYAB									EPS8L3				CYBRD1
CYP4F26P		C6orf226	TMEFF1					CSF1									ERCC6L				CYP1B1
DBNDD1		C6orf58	TOX2					CSF2RB									F13A1				CYP4A11
DCDC1		C8orf88	TTC29					CSN3									F2R				CYSLTR2
DDR1		C9orf72	TWF1					CSRNP1									F2RL1				DACT3
DHFR		CAAP1	TWF1P1					CSTB									FAM111A				DEPP1
DHRS11		CACNA2D4	UBE2SP2					CTPS1									FBLIM1				DERA
DIRAS1		CARD11	ULK2					CTXN1									FBN1				DIO2
DLX2		CASP7	VASH1					CUZD1									FCGR1A				DNAAF3
DNAH10OS		CATSPER1	ZBTB46					CXADR									FGA				DPPA3
DNAI7		CBS	ZBTB8A					CXCL10									FGB				DPT
DNHD1		CBX4	ZDHHC11					CYP4F3									FGR				DPY19L3
DRAXIN		CBX6	ZNF516.AS1					CYTH4									FKBP10				DSE
DYNC2H1		CCDC117	ZNF695					DCDC2									FLNC				DTL
DYNLT2B		CCDC140	ZNF790.AS1					DCTD									FLOT1				DUBR
EDF1		CCDC15	ZNF853					DEFB123									FOSL2				E2F8
EDNRA		CCDC150						DNMT3B									FOXJ1				ELK3
EEF1AKMT3		CCDC17						DSCAML1									FOXS1				ENTPD4
EFCAB10		CCDC28A						DSPP									FUT2				ERICH6B
EFCAB6		CCDC68						DUSP2									GABRP				FAM124A
EGLN3		CCDC82						DYNLL1									GJB3				FAM163A
EMD		CCDC91						ECSCR									GLI3				FAM167A
EMSLR		CCNB2						EDA2R									GLIPR2				FFAR4
ENHO		CCNF						EHBP1L1									GML				FGL2
EPHA6		CCNG2						EIF1AY									GPBAR1				FIGNL1
EPN1		CCT6B						EIF4A1									GPR35				FLNA
ERBB4		CDC20						EIF4EBP1									GPR39				FN1
ERC2		CDC20P1						EIF6									GPRC5A				FRZB
ESPNL		CDC25A						ELF3									GRP				GALNT15
FA2H		CDC26						ELF4									H6PD				GALNT6
FADS1		CDC42EP5						ENC1									HACD1				GASK1B
FADS2		CDC45						EPCIP									HAS1				GBP6
FAM120AOS		CDCA2						EPHA2									HAVCR1				GCSAM
FAM149A		CDCA3						EREG									HBEGF				GIPC2
FAM189B		CDCA5						ESYT1									HESX1				GJA1
FAM219B		CDH4						F3									HIVEP3				GJB4
FAM227A		CDK1						FAM110D									HK2				GLIPR1
FAM238C		CDK13.DT						FAM171B									HMGA2				GLYCAM1
FASN		CDPF1						FAM3D									HP				GPR132
FCGBP		CDYL						FBN2									HPCAL4				GPR141
FER1L4		CEBPG						FGD3									HSPA1A				GPR171
FGF12		CENPA						FHAD1									HSPB1				GPR176
FGFRL1		CENPE						FHDC1									HSPB8				GPX1
FKBP14		CENPF						FHL3									ICAM1				GRID1
FN3K		CENPI						FJX1									IFITM10				GUCA1B
FNBP1P1		CENPL						FOSL1									IFITM3				GULP1
FOXCUT		CENPN						FPR2									IL11				GXYLT2
FRAS1		CENPP						FSTL1									IL1R1				GYPA
FRG1.DT		CENPQ						FXYD5									IL1R2				GZMA
FUT9		CENPW						GADD45A									IL33				GZMB
FZD3		CEP295						GADD45G									IL4R				HAS2
GCAWKR		CEP57						GALE									INHBA				HAVCR2
GFRA1		CERNA1						GAR1									INHBB				HCAR2
GHR		CFAP97						GCH1									ITGA5				HDX
GIPC3		CFB						GDF15									ITGAM				HGF
GLE1		CFLAR.AS1						GGT7									ITGAX				HIGD1C
GLYCTK		CGRRF1						GINS1									ITGB3				HOXA11
GNB3		CHD1.DT						GLS2									ITPKC				HPGDS
GOLGA8DP		CHD7						GNL3									JAZF1				HSPA1B
GPR3		CHEK1						GOLM1									KCNH1				HSPB7
GRM8		CHMP1B						GPATCH4									KCTD1				IL13RA1
GRSF1		CHP1P2						GPR153									KDELR3				IL18RAP
H1.10.AS1		CICP16						GPR27									KLF4				IL1RL1
H4C15		CILK1						GPR84									KLF6				IL21R
HAND2		CIT						GRWD1									KNSTRN				ITGA2
HBE1		CKS2						GVINP1									KRT18				ITGA6
HCN2		CLINT1						HCK									KRT8				ITPRIPL2
HHIP		CNOT10						HEATR1									LGI2				IZUMO1
HHIP.AS1		CNOT6L						HFM1									LIF				KLK1
HLF		CNTRL						HHIPL1									LITAF				KLRB1
HMGA1P1		COL14A1						HID1									LOXL2				KLRC2
HMGA1P8		COSMOC						HKDC1									LRG1				KLRD1
HMGB3		CPAMD8						HMOX1									LRP1				KRT17
HTR1D		CPXM1						HSP90AA1									LRRC32				KRT4
HULC		CRACD						HSPA1L									LTBP2				LACC1
IARS1		CREG1						HSPA5									MAB21L3				LAS1L
IFI44L		CRTAP						IER5									MAFF				LGMN
IFRD2		CTBP2P10						IFFO2									MALL				LILRA1
ILK		CTBP2P9						IFI16									MAMSTR				LIPH
IMPDH1		CTH						IFI27									MAPK4				LMTK3
INAFM2		CTSV						IFNGR2									MCEMP1				LOXL1
INPP5D		CXCL2						IFRD1									MDFI				LOXL4
INSIG1.DT		CXCL3						IGF2BP2									MEDAG				LPCAT2
IPO11		CXCL8						IGLON5									MEFV				LPO
IPO5P1		CYP20A1						IL1RL2									MELTF				LRRC28
ITGA11		CYP3A5						IL1RN									MIR100HG				LRRC55
ITGA4		DARS1.AS1						IL34									MIR4435-2HG				MAP3K8
ITGB6		DARS2						IL36RN									MMP14				MAPKAPK3
JAM3		DBF4B						IL3RA									MMP27				MASP1
JPH1		DBF4P1						INKA2									MMP3				MCHR1
KCNIP1		DCK						INSYN1									MMP7				METTL24
KCNIP3		DDIAS						ISG15									MMP9				MLF1
KCNK2		DEPDC1B						ITGA3									MNDA				MLH1
KCNN1		DHX40						ITGB2									MS4A6A				MMP25
KCNQ5		DIPK2A						ITGB4									MSN				MMP8
KCTD16		DKK2						ITIH4									MSR1				MPP1
KIF5C		DLG1.AS1						ITPR3									MX1				MS4A8
KIF9.AS1		DLGAP1.AS1						JPT1									NEK6				MXRA8
KLHDC9		DLGAP1.AS2						JUN									NFKBIZ				MYB
KLHL23		DLGAP5						KCTD11									NIPAL1				MYO1B
KRT81		DMAC2						KLF16									NNMT				NANOS1
LARGE1		DNAAF11						KLF5									NRAS				NAV3
LINC00471		DNAAF4.CCPG1						KRT20									OAS3				NEK11
LINC01060		DNAH6						KRT76									OASL2P				NID1
LINC01232		DNAH7						LAMC2									OLR1				NIPSNAP3A
LINC01238		DOCK11						LAT2									ORM1				NLRC4
LINC01301		DUS4L						LCA5									OSMR				NLRP10
LINC01572		DUSP6						LCAT									PANX1				NMT2
LINC01842		E2F3						LCP2									PDPN				NOCT
LINC02175		ECM1						LGALS1									PEA15				NPAS2
LINC02246		ECT2						LGALS3									PIK3R1				NPTXR
LRP3		EDNRB						LGALS7									PKMYT1				NT5E
LRP5		EFHC2						LHFPL2									PLAC8				NUCB2
LRRC73		EFL1						LIMK1									PLEKHO2				NXNL2
LRRC75A		EGR1						LMNA									PLIN2				NXPE2
LURAP1		EIF2B2						LPIN3									POPDC3				OGDHL
MAGOH.DT		EIF4EBP3						LRGUK									PPM1J				ONECUT2
MARCHF10		EIPR1						LRRC20									PRRG4				OSM
MARK1		EMC1.AS1						LRRC59									PRSS22				P2RY10
MAST1		EMC3						LRRC71									PTGER4				PARPBP
MATN2		EML2						LSR									PTGFRN				PCSK2
MBOAT7		EPB41L5						LY6E									PXDC1				PDE6H
MCAM		ERC1						LYZ									RAD18				PDGFRA
MCOLN3		ERN1						MAK									RAET1E				PDLIM1
MDGA1		ERO1A						MAL2									RCN1				PENK
MED19		ERV3.1						MAP1A									RDH10				PEX5L
METTL26		ESCO1						MAP1B									RELB				PFKFB3
MFNG		ESPL1						MAP3K1									RELL1				PGBD5
MFSD14B		ETS1						MAP3K14									RGS16				PGPEP1L
MIF4GD.DT		EVI2A						MAP3K6									RHOB				PI15
MMP17		EVI2B						MAPK13									RHOC				PLOD2
MOCS2.DT		EVPL						MAPK6									RHOU				POP1
MRRF		EXOC3L4						MARCHF4									RND1				POP4
MSH5		EXOSC6						MCM3									RNF180				POSTN
MSH5.SAPCD1		EXT2						MCUB									RNF183				POT1
MSX1		FAIM						MEST									RRAD				PPBP
MT1F		FAM102B						MEX3A									RTN4				PPP1R3C
MT1L		FAM117B						MICAL2									RUNX1				PPP1R3E
MT2A		FAM133B						MICALL2									S100A8				PROS1
MTSS1		FAM174A						MICOS10-NBL1									S1PR2				PRR15
MXRA5		FAM234B						MLKL									SAA1				PTAFR
MYBL2		FAM72B						MMP10									SAMD5				PTH2R
MYRIP		FAM72C						MMP19									SBNO2				PXK
NDNF		FAM72D						MOB3A									SDC1				RAB44
NEK4		FAM91A3P						MSANTD1									SELL				RAD51
NEK7		FANCB						MTHFD1L									SELP				RAD54B
NETO1.DT		FANCD2						MTHFD2									SEMA3A				RERG
NETO2		FAR2						MUC1									SERINC2				RETNLB
NFE2L3		FBLN1						MUC17									SERPINA3				RGS1
NFIC		FBXL17						MVP									SERPINB1				RHBDL2
NHS		FBXO25						MYBBP1A									SERPINE1				RHOQ
NKIRAS2		FBXO43						MYC									SERPINH1				RIMKLB
NKX2.5		FBXO5						MYD88									SERTAD4				RND3
NKX6.1		FCAMR						MYH9									SFN				ROR1
NLE1		FEN1						MYO1G									SH2D5				RPL29
NMU		FER						MYOF									SH3BGRL3				RRM2
NOTCH3		FHIT						NABP1									SHISA4				RSPH3
NR2F1		FIBIN						NAIP									SLC15A3				RUNX3
NT5DC2		FILIP1						NCAM1									SLC16A3				S100A14
NT5M		FKBP5						NCF1									SLC34A2				S100A9
NTAQ1		FMNL1						NCF4									SLFN12				SAMD4A
NUCB1		FNTA						NEFM									SMPDL3B				SAMSN1
NUP210		FOXD3						NFIL3									SNX10				SCARB2
OPRD1		FOXD3.AS1						NFKB2									SOCS3				SELENOP
OVCH1.AS1		FOXL1						NFKBIE									SOX11				SEMA3C
P2RX6		FOXM1						NGF									SOX4				SEMA7A
P3H3		FOXO1						NLGN2									SPARC				SERPINA1
PA2G4		FOXQ1						NOC4L									SPHK1				SERPINA10
PA2G4P5		FRAT1						NOP56									SPP1				SGO1
PA2G4P6		FREM2						NOP58									SPRED3				SH3BGRL
PACC1		FUT4						NPTX2									SPSB1				SHTN1
PACSIN3		FZD4						NR2C2AP									SPTLC2				SIRPB2
PADI2		GAB2						NRADDP									STK32A				SIRPG
PADI3		GABARAPL1						NRG1									STX11				SLA
PALD1		GABPA						NSL1									SYT12				SLC10A6
PAOX		GABPB1.IT1						NT5C1A									TACC2				SLC13A1
PCDH1		GATAD2A						OAS1									TGFBI				SLC1A5
PCGF6		GBGT1						OASL									TGM1				SLC6A14
PDE10A		GBP5						OBSL1									TIFA				SLITRK4
PDE3B		GGH						OPN3									TIMP1				SMARCA1
PDLIM2		GK						OXTR									TMEM252				SMCO3
PDLIM3		GK4P						P2RX7									TMEM45A				SNTG2
PDZD4		GK5						P2RY6									TMEM59L				SNX20
PDZD7		GKAP1						PARP3									TMPRSS4				SPON2
PEF1		GLYATL2						PCDHB13									TNC				SPRY1
PHETA1		GNL3LP1						PCDHB16									TNFSF18				SRD5A1
PHF10		GOLGA2P5						PCDHB5									TNFSF9				STEAP2
PHF2		GPN3						PCDHGA11									TOGARAM2				STK17B
PHLPP1		GPR160						PCDHGC5									TPM4				STK38L
PIGZ		GRB10						PDGFA									TREM1				STRA6LP
PIK3R2		GRK7						PDLIM7									TREML2				STYK1
PIKFYVE		GSAP						PGD									TRIB1				SULT4A1
PITPNM3		GSTCD						PGM2									TRIM47				SVEP1
PKN1		GTF2H3						PGS1									TRIM48				SYCP3
PLPPR5		GUSBP9						PHOX2A									TRIM5				SYT13
POLR3G		H2BP1						PIERCE1									TRPV2				SYT15
PPFIA4		HAUS6						PIK3R5									TRPV5				TAGAP
PPIL6		HAUS6P1						PILRA									TSC22D1				TAGLN
PPM1L		HAUS8						PILRB									TTPA				TCEANC2
PPP2R2C		HCLS1						PINX1									TUBA1A				TDG
PRPS2		HCP5						PLA2G2E									UHRF1				TFPI2
PRXL2B		HECA						PLAUR									VASP				TGFB2
PTGS1		HIPK1.AS1						PLB1									VGF				TGFB3
PTPRG.AS1		HIPK2						PLCXD2									VTCN1				TGFBR2
PXYLP1		HIVEP2						PLEC									WDHD1				TIAM2
RAB39B		HIVEP2.DT						PLEKHO1									WNT7A				TLR12P
RAB3D		HJURP						PLK3									XBP1				TLR6
RAB42		HLA.E						PLP2									XDH				TM4SF20
RAB4A		HLA.F						PLPP2									YPEL2				TMED5
RAC3		HLCS.AS1						PMEPA1									YWHAH				TMEM108
RAP2C.AS1		HMGB2						POLD4									ZBP1				TNFAIP8L1
RASD2		HMGCLL1						POLR3D									ZNF239				TNIP3
RASL10B		HMMR						PPAN									ZNF469				TPBG
RASSF5		HMSD						PPP1R13L													TRIM34
RBP7		HNF4G						PPP1R14B													TSPAN11
RBPMS2		HNRNPA3						PPP1R18													TSPAN8
REEP2		HNRNPA3P5						PPP2R5B													TUBB3
RELN		HNRNPA3P6						PPRC1													UBTD2
RFLNA		HNRNPLL						PRG4													UGCG
RGS11		HOXB.AS4						PROCR													UGT2B10
RGS7		HPSE						PRR7													VMP1
RIDA		HROB						PRSS56													VSTM4
RILPL1		HSPA13						PRTN3													WIF1
RNF125		HTR7						PSAT1													ZNF296
RNF138		IBTK						PSD4													ZNF670
RNF182		ICA1						PSORS1C2
RNH1		ICA1.AS1						PTP4A1
ROM1		ICE1						PTPN22
ROR1.AS1		IDI1						PTPN23
RPIA		IDI2.AS1						PTPRN
RSKR		IER2						PTRH1
RWDD4P1		IER3						PVR
SAA2.SAA4		IFNLR1						RAP2B
SAMD15		IGF2						RASGRP4
SAPCD1		IGF2BP1						RCC2
SCARF1		IKBKE						REC8
SCARF2		IL15RA						RECQL4
SCD		IL17C						RELA
SCN1B		IL1A						RELT
SELENOI		IL20RB						REM2
SEMA3F		IL6ST.DT						RGS19
SEMA4B		ILRUN.AS1						RHBDF2
SENP3.EIF4A1		INAVA						RIN1
SEPTIN4		INCENP						RIPK3
SEPTIN5		INHBE						RNF223
SFMBT1		IPCEF1						RPP25
SH2B3		IQCD						RPRM
SH3D21		IQGAP3						RRAS
SHANK1		IRAK2						RRAS2
SHANK3		IRAK3						RRP9
SLC16A9		ITPKA						S100A10
SLC22A3		ITSN2						S100A11
SLC23A1		JAGN1						S100A3
SLC47A1		JAKMIP2						S100A4
SLC8A1		JARID2						SACS
SLC8A1.AS1		KAZALD1						SCX
SLCO2B1		KBTBD2						SDF2L1
SLITRK5		KBTBD4						SEC14L2
SMIM10L2A		KCNAB2						SEMA3E
SMIM14.DT		KCNE1						SERPINA7
SNAP91		KCNMB4						SERPINB9
SOCS2.AS1		KCTD20						SERTAD1
SORCS2		KCTD9						SH2B2
SPA17		KDM7A						SH2D6
SPEF2		KDSR						SH3PXD2B
SSBP2		KIF13B						SLC11A1
ST6GALNAC2		KIF15						SLC12A4
ST8SIA6		KIF20A						SLC20A1
STMN3		KIF20B						SLC2A10
SYNGR3		KIF21B						SLC2A6
TAL1		KIF22						SLC35E4
TGFBR3L		KIF23						SLC38A2
THOC3		KIF24						SLC5A5
TLCD2		KIF2C						SLC7A5
TLE3		KIFC1						SLCO5A1
TMEM121		KLF12						SMIM3
TMEM232		KLF13						SMYD5
TMOD1		KLF2						SNAI1
TMX3		KLF3.AS1						SNHG15
TNFRSF21		KLF9						SPACA7
TNFSF4		KNL1						SPCS3
TNXB		KRT15						SPI1
TOMM5		KRT80						SPIN2A
TOPORS		KYNU						SPIRE2
TOX		L3MBTL4						SPMIP3
TRABD2B		LAPTM5						SQSTM1
TRIML2		LASTR						SRGAP1
TRPV1		LBR						SRM
TSPYL5		LBX2.AS1						SRXN1
TTL		LEF1						SSTR5
TTYH2		LIN9						STAR
TUBA8		LINC00173						STAT3
TUSC3		LINC00342						STBD1
UBE2S		LINC00461						STEAP1
UBE2SP1		LINC00565						STING1
USP13		LINC00622						STMN4
VAV2		LINC00886						STX1A
WDR1		LINC00923						TAC1
WDR54		LINC01096						TACSTD2
WDR77		LINC01135						TAFA1
WNT5B		LINC01152						TAGLN2
YWHAZP10		LINC01426						TES
YWHAZP5		LINC01460						TGIF1
ZC3H7B		LINC01504						THBS1
ZCWPW1		LINC01537						THG1L
ZDHHC3		LINC01589						TINAGL1
ZIK1		LINC01781						TLR2
ZNF132.DT		LINC01806						TMEM158
ZNF404		LINC01881						TMEM184B
ZNF594.DT		LINC01910						TMEM74
ZNF625		LINC02085						TMPRSS11F
ZNF704		LINC02274						TMSB10
ZNF705EP		LINC02361						TNF
ZNF718		LINC02454						TNFRSF10A
ZNF793		LINC02693						TNFRSF12A
		LIPG						TNFRSF1A
		LMNB1						TNFRSF1B
		LONRF3						TNFSF13
		LRP1B						TP53
		LRRC57						TPM3
		LRRC58						TRANK1
		LRRC8C						TRIM6
		LRRC8C.DT						TRIM72
		LRRIQ1						TRMT61A
		LRRK2						TRPV6
		LURAP1L.AS1						TSR1
		LY75.CD302						TTLL7
		LYPD6						TUBA1B
		MAILR						TUBA1C
		MANEA						TUBB
		MAP1LC3A						TUBB2A
		MAP2K6						TUBB2B
		MAPKAPK2						TUBB6
		MASTL						TXNRD1
		MAT2B						UCN2
		MCF2L						UOX
		MCF2L2						USP17L1
		MCUR1						USP27X
		MED28						USP43
		MED30						VAT1
		MEIS3						VIM
		MEIS3P1						VOPP1
		MEIS3P2						XK
		METTL7A						YBX3
		MIA2.AS1						YWHAG
		MID1IP1						ZBTB9
		MIER2						ZDHHC18
		MIR924HG						ZFAND2A
		MIS18BP1						ZFP36L1
		MMGT1						ZFP57
		MMP1
		MMP2
		MMS22L
		MN1
		MPLKIP
		MRPL13
		MRPS27
		MRPS31P4
		MSANTD3
		MTARC1
		MTBP
		MTMR11
		MXD1
		MYH10
		MYH16
		MZT1
		N4BP3
		NCAPD2
		NCAPD3
		NCAPG
		NCOA7
		NDC80
		NDRG1
		NDUFA4L2
		NEDD1
		NEK2
		NEMP1
		NEMP2
		NFKB1
		NGEF
		NHSL1
		NIPBL.DT
		NIPSNAP1
		NKX2.8
		NLGN1
		NPC1
		NR4A1AS
		NR4A2
		NRROS
		NSMAF
		NSMCE1.DT
		NUAK1
		NUPR1
		NUSAP1
		NYAP1
		OBI1
		ODC1
		OLAH
		OR12D1
		OR2A20P
		OR2A9P
		OSCAR
		P2RY1
		P4HA3
		PAN3
		PANTR1
		PAPLN
		PAQR8
		PAX6
		PCAT7
		PCBP2
		PCBP2P2
		PCDH17
		PCDHB12
		PCDHGA5
		PCDHGA6
		PCDHGB3
		PCK2
		PDCD7
		PDE1A
		PDE4A
		PDE5A
		PDGFA.DT
		PDIK1L
		PDRG1
		PDS5A
		PDZD8
		PELI1
		PER1
		PHACTR1
		PHC1
		PHC1P1
		PHLDA1.AS1
		PIF1
		PIGR
		PIM2
		PIM3
		PIMREG
		PKN2.AS1
		PLAT
		PLAU
		PLD1
		PLK1
		PNLIPRP3
		PNRC1
		POU2F2
		POU2F2.AS1
		PPP1R26
		PPP1R26.AS1
		PPP4R4
		PRIM1
		PRKCQ
		PRKN
		PROCA1
		PRPF19.DT
		PRPF4
		PRR22
		PRR29
		PRSS12
		PSMB8.AS1
		PSMC3IP
		PSPN
		PSRC1
		PTGFR
		PTGIR
		PTPDC1
		PTPRG
		PXDN
		PXMP2
		PYROXD1
		RAB38
		RAB43
		RAC2
		RACGAP1
		RAD21L1
		RAD51AP1
		RAG1
		RALBP1
		RASA3
		RASGRP1
		RASSF3
		RBL1
		RBM43
		RBM7
		RBSN
		RCAN3
		RFX3
		RFX3.DT
		RHEBL1
		RIBC1
		RIF1
		RILPL2
		RIMBP3C
		RLIM
		RMI2
		RNF122
		RNF20
		RPAP3
		RPF1
		RPL37A.DT
		RPSAP52
		RRN3P4
		SAMD8
		SANBR
		SAPCD2
		SBF2
		SCN9A
		SDK2
		SEPSECS.AS1
		SERPINB8
		SETDB2
		SGK1
		SGPL1
		SGPP2
		SGTB
		SH2D2A
		SH3PXD2A
		SH3RF1
		SIGIRR
		SIK1
		SIRT1
		SKI
		SKP2
		SLC16A1.AS1
		SLC22A15
		SLC25A14
		SLC25A25.AS1
		SLC25A30
		SLC25A40
		SLC2A3
		SLC2A3P1
		SLC35A2
		SLC39A14
		SLC6A15
		SLC7A2
		SLC7A7
		SLCO4A1
		SLCO4C1
		SLFN5
		SMARCB1
		SMC4
		SMCO4
		SMG1P7
		SMKR1
		SNAPC1
		SNW1
		SNX10.AS1
		SNX29
		SOX5
		SP100
		SP140
		SPAG5
		SPATA6
		SPC25
		SPIN4
		SPRY4.AS1
		SPTBN5
		SPX
		SRP14.DT
		SSPN
		SSRP1
		SSX2IP
		ST7.AS1
		STAMBP
		STARD8
		STK4
		STON1
		STRN4
		STT3A
		STX16.NPEPL1
		SUCNR1
		SUV39H2.DT
		SYT11
		TAF11
		TAF8
		TAPT1.AS1
		TBC1D10B
		TBL1X
		TCN1
		TCTA
		TDP2
		TENM3
		TESMIN
		THRA
		TK2
		TLNRD1
		TMC6
		TMEM106C
		TMEM154
		TMEM156
		TMEM169
		TMEM171
		TMEM88
		TMPPE
		TMTC2
		TMUB2
		TNFRSF11A
		TNFRSF11B
		TNNT1
		TNRC18P1
		TRAF1
		TREX1
		TRIP4
		TRIQK
		TROAP
		TSLP
		TSPAN19
		TTC23L.AS1
		TULP3
		TWF2.DT
		TXNDC16
		TXNIP
		UBAC2.AS1
		UBE2C
		UBE2W
		UBL7.DT
		UBN2
		UGGT1
		UGGT2
		USP34.DT
		VAMP4
		VEGFA
		VNN3P
		VPS13B.DT
		WARS1
		WASF3
		WDR7
		WDR76
		WHAMMP1
		WHAMMP4
		WNT5A
		WSB2
		XAF1
		XKR5
		ZBTB12BP
		ZC3H6
		ZDBF2
		ZDHHC13
		ZFP14
		ZFP69B
		ZFP91
		ZGRF1
		ZKSCAN8
		ZNF112
		ZNF217
		ZNF268
		ZNF300
		ZNF362
		ZNF391
		ZNF395
		ZNF486
		ZNF490
		ZNF501
		ZNF512
		ZNF585A
		ZNF641
		ZNF687.AS1
		ZNF703
		ZNF711
		ZNF724
		ZNF805
		ZNF818P
		ZNF85
		ZNF93
		ZZZ3

## Sheet: Commonly upregulated DEG
caki.siC3	caki.siC3...HK2.siC3	caki.siFB	caki.siFB...caki.siC3	caki.siFB...caki.siC3...HK2.siC3	caki.siFB...Gly_C3-/-......caki.siC3...PBS.C3-/-...	caki.siFB...Gly_C3-/-......PBS.C3-/-...	caki.siFB...HK2.siC3	Cfb-/-...	Cfb-/-......caki.siC3	Cfb-/-......caki.siFB	Cfb-/-......caki.siFB...caki.siC3	Cfb-/-......caki.siFB...Gly_C3-/-......caki.siC3...HK2.siC3...PBS.C3-/-...	Cfb-/-......caki.siFB...Gly_C3-/-......caki.siC3...PBS.C3-/-...	Cfb-/-......caki.siFB...Gly_C3-/-......PBS.C3-/-...	Cfb-/-......Gly_C3-/-......caki.siC3...HK2.siC3...PBS.C3-/-...	Cfb-/-......Gly_C3-/-......caki.siC3...PBS.C3-/-...	Cfb-/-......Gly_C3-/-......HK2.siC3...PBS.C3-/-...	Cfb-/-......Gly_C3-/-......PBS.C3-/-...	Cfb-/-......HK2.siC3	Gly_C3-/-......caki.siC3...PBS.C3-/-...	Gly_C3-/-......HK2.siC3...PBS.C3-/-...	Gly_C3-/-......PBS.C3-/-...	HK2.siC3
A2MP1	ADGRF4	ABCA17P	ACER2	AOX1	CA11	ADGRB2	FGFBP1	A1CF	ARHGAP24	ABCC9	ABCA13	AQP3	AQP11	ACHE	FLVCR2	ADRB1	APOE	A4GNT	KCNQ3	ACACB	LETM2	ABCA2	ADGRL3
ABCC10	CFH	ABCB9	ADAMTS3	FAXDC2	GRIN2C	ANGPTL6	IFITM10	AADAC	BDH2	ACMSD	AKR1D1		DUSP15	ADHFE1		BHMT	PDE4C	AADAT		C1S	PTGDS	ABCB4	ADM
ACTG1P14	EVI2A	ABCC2	AGR2	GDNF	PLA1A	APC2	MARCHF4	AAMDC	GRIA3	ANKRD34B	DPP4		SLC23A3	CHRDL1		LRRC31		ABCA4		CCDC183		ABHD1	ATP2A1
ADAM28	GPR37	ABCG2	AIM2	KCNK15	SLC4A10	CEACAM19	NTNG1	ABAT	PRDM1	ASPA	ENPP2		USP2	CR2		PDZRN4		ABCA8		CLIC3		ABLIM2	BCL2L15
ADGRF1	HMOX1	ACAP3	AMHR2	MYH15		CEND1	RAB27B	ABCA6	SPATA6L	ASS1	KMO			CYP4F11		PPARGC1A		ABCG8		CORIN		ACOT11	C13orf46
ADGRF2	ITGB2.AS1	ACSL6	AMZ1	SYT16		CKB	SEMA3A	ABCC6	SUCNR1	CDC42EP3	SIM1			GAMT		PROX1		ACAA2		OLFM2		ACTN2	C6orf141
ADGRV1	PAX8.AS1	ACTA2.AS1	ANGPTL2			CPLX1	SLC22A18AS	ABCD4		CDNF	TMEM191B			GFRA1		PTPRR		ACAD10		RASGEF1B		ACTN3	C9orf43
AK3	SLC34A2	ACTBL2	ANGPTL4			CPT1B	SLC28A3	ABHD14A		F5	TTYH1			HLF				ACADM				ADAM1A	CASC19
ANG		ACTG1P1	ANKRD1			DIPK1B	XDH	ABHD14B		FOLR1				NCCRP1				ACOT1				ADAMTS16	CCDC110
ANGPTL1		ADA	ATP6V0A4			DKK3		ABHD18		HOPX				NPR2				ACOX2				ADD2	CCND1
ANXA1		ADAM12	ATP6V1A			DOK7		ACAA1		ITGBL1				PHYHIP				ACP6				ADGRG5	CEP295NL
AQP9		ADGRG1	BEST3			FDXR		ACAD11		LSAMP				RAP1GAP				ACSL1				ADM2	CLDN1
ARID3A		ADRA1B	BLCAP			HAPLN3		ACE2		MACROD2				SCNN1A				ACSM1				ADRA2C	DACT3
ARL14		AFP	C1QTNF6			IGSF23		ACOT13		MAP3K7CL				SGK2				ACSM5				AK7	DLG5.AS1
ARSD		AGT	CCN5			MANEAL		ACOT4		MCRIP2				TMEM117				ACSS2				ALAD	DNAAF4
ARSL		AK1	CDH10			ME3		ACOX3		MGAM				TMEM52B				ACY1				ALDH1A1	DNAH12
ATP2C2.AS1		AK4P1	CDH17			P2RY2		ACSS1		NDRG2								ACY3				ALDH1L2	EDIL3
ATP6AP1		AKR1B15	CLMAT3			PDE6G		ACSS3		PAQR9								ADGRG4				ALOX12B	EPHA5
ATP6V0E1		ALOX5	CNN1			PHYHIPL		ADAM32		PDE6A								AFM				ALPK3	ETFRF1
AURKAP1		ALOXE3	COL1A1			PITPNM3		ADAMTSL3		PRSS8								AFMID				AMD1	GIPR
BCL2A1		AMBP	CPM			PLEKHB1		ADCY10		ROPN1L								AGMAT				AMY1A	HMGB1P3
BDH2P1		ANK1	CYP1B1			PRSS36		ADD3		SYNGR1								AGMO				ANGPT2	IL12A
BLACAT1		ANKLE1	CYTL1			RBFOX3		ADGRB3		TMEM163								AK4				ANKMY1	IL7
BMF		ANKRD13B	DDAH1			RIMKLA		ADRA1A		TMEM64								AKR1C1				ANKRD9	LCNL1
BSN		AP2M1	DGAT2			SLC22A3		ADSS1										ALDH1B1				ANO4	LINC00937
C10orf99		APBA1	DIO2			TMEM151A		AFAP1L1										ALDH3B2				AOX3P	LINC01094
C1R		APBB1	DIRAS3					AGBL3										ALDOC				APELA	LINC01176
C3AR1		APLP1	EDN1					AGTR1										AMT				APOA1	LINC01358
C4orf19		ARHGAP1	EDN2					AGXT2										ANGPTL3				APOC3	LINC02015
CABLES1		ARHGAP28	EFCAB5					AHCY										ANK2				AQP2	LINC02535
CALCRL		ARHGAP28.AS1	ENTPD3					AIFM3										ANPEP				AQP4	LINC02832
CAVIN2		ARHGAP29.AS1	ESAM					AKAP5										APEH				AQP6	LIX1
CCDC71L		ARHGAP42	ESPN					ALDH4A1										ASCC1				ARC	LRRC8C.DT
CD14		ARL6IP5	F2RL2					ALDH5A1										ASPG				ARHGEF9	MBNL1.AS1
CD274		ARRDC3.AS1	FAM225B					ALDH6A1										ATP2B2				ARMC12	MIR137HG
CDA		ARSI	FILIP1L					ALDH8A1										ATP4A				ARSG	MIR181A2HG
CDC26P1		ARVCF	FILNC1					ALDOB										ATP6V1C2				ART3	NLGN1
CEBPD		ASIC4	FSTL1					ALKAL2										ATP8B4				ASB11	NOS1AP
CFB		ATP10A	FSTL3					ALPL										B3GALNT1				ASCL4	NT5E
CFI		ATP6V1FNB	GDF5					AMACR										B3GAT2				ASPN	ODAPH
CFL1P5		AVPR1B	GNPTG					AMDHD1										BAAT				ATP10D	PCAT1
CGB8		AVPR1B.DT	GPER1					ANGPT1										BAIAP3				ATP12A	PTPRD.AS1
CHI3L1		B3GNT9	GPR87					ANKRD13C										BBOX1				B3GNT8	PTX3
CHI3L2		B4GALT1.AS1	GRHL3					ANKRD65										BCL11B				BAHCC1	RASGRF2
CITED2		B4GAT1	H2BC12					ANXA13										BCO2				BBOF1	RFESD
CLU		BAALC	HCAR2					APOM										BDH1				BCAT2	SAMD5
COL6A5		BDNF	HS3ST1					AQP1										BEND5				BEX4	SBSN
COL8A1		BGN	IGFBP3					AR										BHMT2				BHLHE41	SHC4
CORT		BLNK	IL1RAP					ARHGEF19										BMP15				BSND	SHISA9
CSGALNACT2		BOC	INKA2					ARHGEF38										BMP7				C19orf85	SLC22A31
CTSL		BOK	KCND2					ARHGEF39										BPHL				C1QL4	SYNE3
CTSS		BRINP2	KLHL4					ARMH4										C10orf90				C21orf140	TLE6
CXCL5		BRME1	KRT23					ARSK										C1orf56				C22orf15	TLR1
CYB561A3		BRSK2	LINC00643					ART4										C2orf80				C2CD4D	TLR3
CYP2E1		BTG2	MAB21L3					ASB9										C8A				C6orf132	TMEM255A
CYP2T1P		C10orf95	MAP1LC3C					ASL										C8orf88				CABP2	TPI1P2
CYP7B1		C12orf60	MGST2					ASPDH										CA14				CABYR	TRANK1
CYRIA		C1orf53	MIR1307					ASTN1										CA5A				CACNA1E	U2AF1L5
DAB2		C1QL1	MMP7					ATOSA										CA7				CBR3	USP18
DACT1		C1QTNF2	MPZ					ATP6V1B1										CABCOCO1				CBX2	VGF
DAPP1		C4orf47	MSLN					AUH										CACNA2D2				CBX4	ZBED2
DDIT4L		C4orf54	MSLNL					B3GALT5										CACNB4				CBX7	ZDHHC8P1
DEFB1		C7orf61	NEDD4					BAIAP2										CALB1				CBY3
DFFBP1		CACFD1	NIPAL4					BMNCR										CAMK1G				CCDC13
DMBT1		CACNA1H	NIPSNAP3A					BNC2										CBR1				CCDC150
DPP4.DT		CALCR	PALMD					BNIP3										CBS				CCDC162P
EBF1		CALHM5	PLA2G4C					BTNL9										CCDC170				CCDC17
EBI3		CASTOR1	PLCXD2					C1QTNF3										CCDC180				CCDC191
EDEM2		CASTOR3	PPP1R14A					C4orf33										CCDC62				CCL28
EEF1GP1		CCDC80	PRKG2					C8G										CDHR2				CCNB1IP1
ELF3		CCIN	PRR19					CA12										CDKL1				CDKL4
ELOVL3		CCL26	PRRG2					CA4										CEACAM1				CDO1
ERICH2.DT		CCN3	PTPRN					CA9										CECR2				CEACAM16
EVI2B		CD34	PYHIN1					CASR										CES1				CFAP46
FABP4		CD7	RBP4					CATSPERE										CFAP126				CHIA
FAM126B		CDC42BPG	RERGL					CCDC141										CFAP54				CHRM1
FAM20A		CDH16	RP2					CCDC15										CHST3				CILP
FAM217B		CDIP1	RPL37P23					CCDC169										CIART				CITED4
FAM234B		CDKN1A	RPS4XP1					CCDC68										CIT				CLCN2
FCER1G		CDKN1C	S1PR1					CCDC85A										CLCNKA				CLDN19
FTH1P19		CDRT1	SBSPON					CCDC87										CLDN10				CLEC1B
FTH1P4		CDS1	SCN2A					CCKAR										CNTD1				CLNK
FUCA1		CEL	SDC2					CCL19										CNTFR				CNTNAP1
GABRA1		CENATAC	SERPINB3					CCS										COCH				COL23A1
GALNT4		CENPT	SERPINB4					CCSER2										COL27A1				COL24A1
GASK1B		CES4A	SERTM2					CD164L2										COMP				COL26A1
GBA		CGB7	SESN1					CDH13										COX7A1				COL6A6
GCH1		CGN	SHOC1					CELA1										CPEB3				CORO6
GDF15		CGREF1	SLC31A2					CES2										CRY2				COX6A2
GDPD5		CHCHD10	SLC40A1					CETN4P										CTNNA2				COX8BP
GGT7		CHD5	SLC44A3					CFAP70										CTSF				CPNE5
GLT8D2		CHRM3	SLX1B					CHADL										CXCL12				CPSF4L
GP6		CHRNA6	SMIM3					CHRNA4										CYP2D6				CRIP3
GPR132		CISH	SMPDL3B					CIDEB										CYP2J2				CRYGA
GPR143		CLDN4	SNX18P26					CIMIP2B										DBP				CSF1R
GRHL1		CLDN9	SOX6					CLEC2D										DCXR				CUX2
GRN		CLMP	SPARC					CLIC6										DHTKD1				CXCL11
GXYLT1		CLSTN2	SPINK1					CMAHP										DIO1				CYP17A1
H1.2		CLTRN	SPINT1					CMBL										DLG2				CYP2B6
H2AB1		CNR1	SRPRB					CNDP1										DMTN				CYP2U1
H2AC8		COBLL1	SRPX2					CNPY1										DNAH11				CYP46A1
H2BC5		COL17A1	STS					CNTN5										DNASE1				CYS1
H3C10		COL25A1	TFEC					COL4A3										DPF3				DEFB136
HCK		COL4A6	TMEM217					COLGALT2										DUOX1				DLK1
HEATR6.DT		COL6A1	TMTC1					COLQ										DZIP1				DLL1
HIF1A.AS1		CPA4	TNFAIP8L3					COQ8A										EAF2				DMAC2
HLA.DMA		CPE	TPRG1					CPNE4										EDAR				DMRTC1
HLA.DOB		CRABP2	TSPAN1					CRB1										EFCAB12				DNAAF1
HOXA1		CRACDL	TSPAN10					CRISPLD1										EFHD1				DNASE1L3
HOXB5		CRACR2B	TSPAN5.DT					CROCC										EGF				DNHD1
HOXC13		CRELD2	ZACN					CSMD1										ELL3				DQX1
HSD3B7		CROT						CSRNP3										EMX1				DYNLT1
HSPB8		CRYAB						CSRP2										ENDOU				EBPL
ICAM2		CRYGS						CTH										ENTPD8				ECI1
IFI6		CSP2						CTNNA3										ESRRA				EDDM3A
IFIT2		CTSH						CTTNBP2										ESRRB				EGFEM1P
IL11RA		CTXN1						CTXND1										ETNPPL				ELAVL3
IL22RA1		CXADR						CUBN										EVA1C				ENGASE
IL4I1		CXCL16						CWH43										EVPL				ENO2
IL6R		CYGB						CYB5RL										FABP1				EPHB1
INHBA		CYP24A1						CYFIP2										FABP3				EPHX1
ITGA5		CYP4F26P						CYP2C23P										FADS6				EPOR
KCNE4		CYTH4						CYP2C8										FAM107A				ERMARD
KCNK6		CYYR1						CYP4A11										FAM13A				ETNK2
KCNV1		DAGLB						CYP51A1										FAM228B				EXTL1
KDR		DAW1						CYSLTR2										FAM229B				FA2H
KLRC2		DCAF12L2						DCLK3										FAM78A				FAM117A
KLRC3		DDX41						DDC										FANCD2OS				FAM221A
KLRC4		DENND6B						DECR2										FBXO40				FAM222A
KLRK1		DGAT1						DEFB116										FGF9				FAM228A
LAMB3		DGKQ						DEPP1										FGFR3				FAM78B
LAMP2		DIRAS1						DGKB										FITM1				FBXO44
LAT2		DIRAS2						DHDH										FMO4				FCGBP
LIN28B		DISP2						DHFR										FMOD				FIBIN
LINC00460		DMD						DHRS3										FN3K				FMC1
LINC02392		DMPK						DIXDC1										FOLH1				FMO3
LINC02605		DNAH10OS						DLEC1										FRMPD3				FNDC10
LINC02733		DNAI3						DLGAP1										FRS3				FNDC9
LIPH		DNAJB13						DMGDH										G0S2				FOLR2
LOXL4		DNAJC9.AS1						DNAH17										GALNT11				FRMPD1
LUM		DOCK3						DNAH3										GALNT14				GABRD
LURAP1L		DOLK						DNAH5										GANC				GABRR2
LY96		DPM2						DNAH7										GCGR				GAL3ST1
MAN1A1		DPP7						DNAJC12										GCNT1				GALNT9
MCOLN1		DRC1						DNAJC28										GGNBP1				GATA5
MEF2C		DUSP14						DNAJC6										GHRHR				GC
METTL7B		DUSP23						DPEP1										GLB1L2				GDPD3
MIPEPP1		EEF1A2						DPYD										GNMT				GFRA2
MIR1302.9HG		EEF1AKMT4						DPYS										GPD1				GFRA4
MMP28		EFEMP1						DRC9										GPR135				GNAZ
MPPE1		EFNA1						DRD1										GPR179				GNG7
MR1		ELFN2						ECHDC3										GPX6				GPAT2
MROH9		ELL2P1						ECI2										GRAMD1B				GPC5
MRPS30.DT		ELN						ECM2										GREB1				GPR62
MSANTD1		ENDOD1						ECRG4										GRIN3A				GPT
MSR1		ENKUR						EGFL6										GSTK1				GRM4
MSRA		EPCAM						ENPP3										GSTM2				GSG1L
NEU1		EPHA4						EPM2A										GSTZ1				GSTM1
NINJ2		EPHX2						ERVFRD-1										GUCY2F				GSTM4
NIPAL2		EPN3						ESRRG										HAO2				GSTO2
NKAIN4		ERP27						ETNK1										HGD				GUCY2GP
NLRC5		F2						F13B										HHATL				HAL
NPL		FAAH						FABP7										HMX2				HDDC3
NRROS		FAM13C						FADS2										HPD				HDHD3
NTAN1P2		FAM151B.DT						FAH										HSBP1L1				HNF1A
NTF4		FAM220A						FAHD1										HSD17B14				HRH3
OASL		FAM226B						FAM151A										HSD3B1				HRNR
OLAH		FAM71E1						FAM81A										HSPA2				HSD17B13
OLFML3		FAT2						FBLN7										ID4				HSF2BP
P2RX4		FAXC						FBP1										IDO2				HSF4
PAQR5		FBXW10						FBXO32										IGF2				HTR4
PCDH20		FER1L4						FGGY										IGFBP1				IFI44L
PCDHA4		FETUB						FHIT										IL15				IFIT1
PCNPP1		FGB						FHL1										IL17F				IGDCC3
PCSK1		FHL2						FLRT1										INSRR				IGHA1
PDCD1LG2		FKBP7						FMO1										ISOC2				IGHG1
PDGFD		FLG						FMO2										IZUMO4				IGHM
PGAM1P7		FLG.AS1						FOXD2										JPX				IGKC
PGM2L1		FLNC						FTCD										KCNC3				IGLC1
PILRA		FLRT2						FUT9										KCNJ1				IGLC2
PINK1		FLRT3						G6PC1										KCNJ13				IGLL1
PLAC9		FMN2						G6PC2										KCNS1				IGLV7-43
PLB1		FOLR3						GABARAPL1										KCNT1				IL15RA
PLTP		FOXA1						GABRB3										KIFC2				INCA1
PMS2P13		FOXH1						GAS1										KLF1				INPP5J
PPIC		FOXS1						GAS2										KLF15				INTS6L
PPIC.AS1		FRMPD2						GASK1A										KLHDC9				IQANK1
PPM1H		FST						GATD3										KLHL3				IQCC
PPP1R14B.AS1		FUT2						GATM										KLKB1				IQSEC2
PROSER2.AS1		GABPB2						GCAT										KNG1				ISM1
PRRG4		GALNT18						GCDH										KYAT3				ITGA2B
PTGS2		GALNT5						GDF10										LCTL				JCHAIN
PTPRB		GALNT7						GGCT										LHFPL1				KALRN
PTPRO		GAP43						GK										LHX1				KCNAB3
RAB11FIP2		GAS6						GLB1L										LIN7A				KCNG1
RAB5IF		GASK1B.AS1						GLDC										LMOD3				KCNJ3
RAB7B		GDF6						GLUL										LRRC52				KCNN1
REEP6		GFUS						GLYAT										LRRC66				KCNN2
RMDN2		GLIPR2						GLYCTK										LYPLAL1				KIAA1614
RND3		GLS2						GNA14										LZTS3				KIFC1
RNF128		GPC6						GNG4										MAGIX				KISS1R
RNFT1		GPNMB						GPAM										MATN4				KLHL33
RPL23AP93		GPR176						GPC4										MCCC2				KLK1
RPL32P24		GPR45						GPM6A										MCOLN3				LAMA1
SAA1		GRIK2						GPR12										MEP1B				LARGE2
SAMSN1		GSTM3						GPR137B										MFRP				LCA5L
SATB1		GUCY1A2						GPR137C										MGLL				LGR5
SCAT8		HCAR3						GPR85										MMAB				LGR6
SELENBP1		HCN1						GPRIN3										MOGAT2				LHCGR
SELENOP		HCN2						GRB7										MPP4				LIN7B
SEMA7A		HCN4						GRIN3B										MPV17L				LINC01089
SERPINI1		HGH1						GRIP2										MRNIP				LINGO4
SERTAD1		HHIPL2						GSTA1										MROH7				LIPG
SLA2		HPX						GSTT2										MTURN				LNX1
SLC20A2		HRCT1						GYS2										NALCN				LRFN2
SLC29A3		HSPB1						HAAO										NAP1L5				LRRC34
SLC2A3		HSPB1P1						HACL1										NAPSA				LRRC3B
SLC2A3P4		IDUA						HASPIN										NAT1				LRRC56
SLC36A1		IFI30						HDC										NAT8				LRRC75B
SLC37A1		IGSF10						HINT2										NEIL2				LY6G6D
SLC38A10		IL1RL1						HMCN1										NEPNP				LYPD2
SLC49A3		IL34						HMCN2										NEU2				MAB21L4
SLC7A14.AS1		INA						HNF4A										NGEF				MAMDC4
SLPI		INKA1						HNMT										NNT				MAOA
SMIM10		INPP5D						HPGD										NR0B2				MAPK8IP2
SMIM15		ITGA7						HPS5										NR1I3				MEIOB
SMPDL3A		IVNS1ABP						HSPB7										NRAP				MICA
SNRPA1.DT		JPH2						HYKK										NXPH4				MIR670HG
SOCS1		KAZN						IDH2										OLFML1				MMP12
SOCS3		KCNH7						IFFO1										OMD				MPIG6B
SPINK13		KCNJ8						IFITM3										OSR2				MPP3
SPRN		KCNK12						IGFALS										OVOL1				MTUS2
SSTR5		KCP						IGFBP4										PAH				MYCBPAP
SSTR5.AS1		KIAA1522						INSC										PANTR1				MYH14
ST8SIA4		KIF17						IPCEF1										PBLD				MYH7
ST8SIA5		KIRREL3						IRS1										PCK1				MYL7
STEAP4		KITLG						ITGB8										PCSK4				MYMX
STING1		KLHL13						ITPR2										PDK2				MZB1
STOM		KLHL35						IYD										PELI2				NACAD
STRIP2		KLLN						JPH1										PER2				NAGS
SUGCT.AS1		KRT10.AS1						KBTBD11										PER3				NDUFAF3
SULT1A3		KRT27						KCNAB1										PERM1				NELL2
SUN3		KRT32						KCNE5										PFN4				NEURL2
TACSTD2		KRT34						KCNIP2										PHF24				NFYC
TAX1BP3		KRT8						KHK										PIK3C2G				NINL
TCHH		KRT8P3						KIAA0319										PJVK				NOL3
TEKT4P2		KRT8P45						KL										PLD6				NPB
TEN1		KRTAP2.3						KLF12										PLK5				NPC1L1
TENT5A		L1CAM						KLHL38										PLPP7				NPM2
TFPI		LACTB2.AS1						KRT222										PM20D1				NPTX1
TFPI2		LAYN						KSR2										PNCK				NPY
TM2D2		LCMT1.AS1						KY										PODN				NPY6R
TMEM102		LEPROT						KYNU										PPARGC1B				NR2E3
TMEM130		LGALS3						L2HGDH										PPIL6				NTF3
TMEM144		LIMA1						L3HYPDH										PPP1R16B				NTHL1
TMEM30BP1		LINC00519						LACTB2										PPP1R1A				NTRK1
TMEM59		LINC00702						LAMC3										PPP1R1B				NUGGC
TMPRSS11F		LINC00857						LANCL3										PRDM16-DT				NXNL1
TMSB4XP1		LINC00944						LPAR3										PRKN				NYAP1
TNFSF13B		LINC01014						LPIN1										PRLR				OAS1
TNIP3		LINC01111						LRP2										PRODH2				ODF4
TRAPPC6A		LINC01151						LRP4										PROZ				OSTN
TTC17		LINC01173						LRPAP1										PRSS12				OTOA
TTLL6		LINC01357						LRRC19										PRSS53				OXLD1
TUBBP10		LINC01913						LRRK2										PTCHD4				P2RX2
UBD		LINC01943						LYPLA1										PTGER3				P2RX3
UPK3B		LINC02331						LZTS1										PTPDC1				P2RX6
VAMP8		LINC02381						MACROD1										PVALB				PADI1
VPS4B		LINC02547						MAF										PXMP2				PADI2
VWA5A		LINC02889						MAMDC2										RAB11FIP4				PANX2
YY2		LINC02918						MANSC4										RAB3A				PDE9A
ZFP91.CNTF		LMAN2L						MAP2K6										RALYL				PGA3
ZNF28		LMCD1						MAPK15										RANBP3L				PHOSPHO1
ZNF763		LNCAROD						MARCHF10										RAPSN				PIANP
		LNCOG						MBL2										RDH16				PIGZ
		LRFN1						MCUR1										RHBG				PLEKHA7
		LRRC24						MDH1										RHCG				PLIN4
		LRRC32						MERTK										RILP				PLIN5
		LRRC8A						METRN										RNF208				PLP1
		LRRN1						MGAT3										RNF212B				PNLIPRP1
		LRRN4						MIOX										RORC				PNPLA7
		LSM10						MME										RPH3A				PPP1R3F
		LUARIS						MPC2										RUFY4				PRICKLE4
		LY6K						MPST										RYR2				PRNP
		LYNX1						MREG										SALL3				PRPH
		LYPD1						MSANTD5										SAT2				PRR18
		MAL2						MSMP										SECTM1				PRSS41
		MAP7D2						MTHFD1										SEMA4G				PRXL2B
		MAPK8IP1						MTTP										SFRP1				PTGER1
		MARCHF1						MYH6										SFXN4				PTPN5
		MARCHF2						MYLK3										SHANK2				PYCR1
		MARCHF3						MYO5A										SHD				R3HDML
		MARVELD2						NARF										SIRT3				RAB2B
		MAST4						NCAM2										SLC12A1				RAD51AP2
		MATN2						NDST3										SLC13A2				RAPGEFL1
		MEST						NIPSNAP1										SLC15A2				RASAL1
		MFGE8						NIT2										SLC16A11				RASL11B
		MFSD13A						NLRP6										SLC16A4				RASSF10
		MGARP						NOTUM										SLC16A7				RCCD1
		MGAT4A						NOX4										SLC17A2				RCOR2
		MGAT5B						NPAS3										SLC22A10				RDH12
		MICALL2						NPNT										SLC22A13				REC8
		MIOS.DT						NRTN										SLC22A4				REN
		MIR193BHG						NUPR2										SLC23A1				RGS9
		MISP						NXPE3										SLC25A10				RIC3
		MLXIPL						ODAD3										SLC25A42				RNASE1
		MMP24						OGDHL										SLC27A1				RNASE4
		MOXD1						OGN										SLC28A1				RNASET2
		MRAS						OLFM3										SLC2A12				RNF182
		MROH8						OR2V2										SLC2A4				RNFT2
		MRPL50						OR2Y1										SLC2A5				RNLS
		MT.ND6						OSBPL8										SLC2A8				ROGDI
		MTARC2						OXCT1										SLC34A3				RPS6KA1
		MUC19						OXCT1-AS1										SLC35F1				RRH
		MYO5B						OXGR1										SLC37A4				RTL5
		MYOM2						P3H2										SLC39A5				RTN1
		MYOZ2						PACC1										SLC43A2				SAPCD1
		MYPN						PAPSS2										SLC4A1				SCFD2
		NDST1						PAQR6										SLC5A11				SCGB1C1
		NDUFC2.KCTD14						PAQR7										SLC5A6				SCRN1
		NECTIN4						PCDH17										SLC6A13				SCRT2
		NEDD9						PCMTD2										SLC6A20				SDHAF1
		NEGR1						PCSK6										SLC6A4				SERPINA6
		NEXN.AS1						PDE11A										SLC6A7				SGCZ
		NIM1K						PDP2										SLC9A8				SH2D6
		NINJ1						PDPR										SLITRK6				SHH
		NLGN3						PDZD2										SMAD9				SHISA7
		NMNAT2						PDZD7										SMIM24				SHISAL1
		NNAT						PDZK1										SMIM5				SHMT2
		NOG						PEX5L										SMPX				SHROOM1
		NPBWR1						PFKM										SOSTDC1				SLC12A5
		NPIPB6						PGAM2										SPATA2L				SLC1A7
		NPR3						PIP5K1B										SPP2				SLC22A14
		NPTXR						PKD2L2										SRCIN1				SLC25A25
		NRXN3						PLPPR4										STARD8				SLC25A29
		NTN4						PLS1										SULT1A1				SLC25A35
		NYAP2						PORCN										SULT1C2				SLC26A10P
		NYX						POU3F3										SUSD3				SLC26A6
		OLFML2A						PPARA										SV2A				SLC26A7
		OXTR						PRIMA1										SYN2				SLC2A9
		P2RX5						PRKAG3										SYP				SLC38A3
		P2RY6						PRKCQ										SYT3				SLC4A5
		P4HTM						PROB1										SYTL3				SLC4A8
		PABPC1P1						PRODH										TARM1				SLC6A12
		PAG1						PSD										TBC1D16				SLIT1
		PCLO						PTER										TEF				SMCP
		PCOLCE2						PTPRD										TET1				SMIM31
		PCSK1N						QDPR										THNSL2				SMIM38
		PDZD4						RAD9B										TLN2				SORCS3
		PEDS1						RADX										TMEM151B				SOX2-OT
		PEG10						RARRES1										TMEM207				SPAG4
		PGRMC1						RARRES2										TMEM61				SPAG5
		PHLDA3						RASGEF1A										TMEM72				SPATA1
		PIK3R3						RBFOX1										TMEM86A				SPATC1
		PKIB						RETSAT										TMIE				SPATS1
		PKP3						RGS7BP										TNFAIP8				SPEF2
		PLAC8L1						RHBDL1										TSPOAP1				SPINK4
		PLCD3						RNF152										TSTD1				SPO11
		PLCE1						RP1										TYW3				SPTBN2
		PLEKHS1						RTL4										UGT1A3				SSPOP
		PLPPR2						RUNX1T1										UGT2B4				STC2
		PLXNA2						SAP30										UNC13C				STKLD1
		PLXNB1						SARDH										UPB1				SUSD4
		PLXNB3						SCN3A										UROC1				SVOPL
		PNMA6A						SCN4B										VDR				SYCN
		PODXL2						SERPINA1										VN1R17P				SYTL1
		POLR3H						SFXN2										WDR93				TAGAP
		POMGNT2						SH3BP5										WNT5B				TAL2
		POPDC2						SH3D21										WSCD1				TBX6
		PPIEL						SHF										XIST				TCF21
		PPME1						SHMT1										XPNPEP2				TDRD12
		PPP2R2B						SIAE										ZC2HC1C				TENM2
		PPT2.EGFL8						SLC10A5										ZC3H6				TEX14
		PRAG1						SLC12A6										ZNF454				TFF1
		PRDX2						SLC13A4										ZNF750				THEM6
		PREX2						SLC16A9														TJP3
		PRICKLE1						SLC18A2														TLCD1
		PRKG1.AS1						SLC19A3														TM6SF2
		PRR16						SLC22A17														TMC8
		PRSS23						SLC22A5														TMEM132E
		PSKH1						SLC22A8														TMEM221
		PSTPIP2						SLC25A13														TMEM45A
		PTCH2						SLC25A16														TMEM53
		PTGER2						SLC25A21														TNN
		PTGER4						SLC27A2														TOP3B
		RAB6B						SLC34A1														TPSAB1
		RAMP1						SLC38A11														TRA
		RASD2						SLC39A8														TRIB3
		RASGRF1						SLC3A1														TRIM34
		RASGRP3						SLC46A3														TRIM40
		RASL10B						SLC4A4														TRIM61
		RASL11A						SLC51B														TRIM80P
		RBM5.AS1						SLC5A12														TRMT9B
		RBP7						SLC5A2														TRNP1
		RELL2						SLC5A8														TSHR
		RERG						SLC5A9														TSSK1A
		RGPD1						SLC60A1														TTLL10
		RGS20						SLC67A1														TTLL13
		RGS22						SLC67A2														TTLL9
		RHOBTB1						SLC6A19														UNCX
		RHOD						SLC7A8														USP29
		RIMS2						SLC8A1														VN1R5
		RN7SK						SLC9A2														VSIG10L
		RPL23AP64						SLC9A3														VWA3A
		RPP25						SLCO4C1														WASF3
		RPPH1						SLIT2														WDR17
		RRAD						SLITRK1														WNT8B
		RTL8B						SMARCA2														WSCD2
		RUNDC3A						SMCO3														ZCCHC12
		RUNDC3A.AS1						SMIM22														ZFP69
		S100A3						SMIM34														ZFR2
		S1PR2						SMIM35														ZKSCAN4
		SAMD12						SNHG11														ZNF235
		SARM1						SNX29														ZNF286A
		SBK3						SORD														ZNF419
		SCAMP5						SOST														ZNF467
		SCARNA13						SOWAHA														ZNF493
		SCARNA16						SOX10														ZNF879
		SCARNA2						SPAG8
		SCARNA9						SPC25
		SCG2						SPOCK3
		SCHIP1						SPTB
		SCO2						ST8SIA1
		SCUBE2						STAB2
		SEC61G.DT						STPG1
		SELENOM						STRA6
		SELENOW						STXBP4
		SEMA3B						STXBP5L
		SEMA3E						SULT1B1
		SEMA6C						SULT1D1P
		SERHL2						SUSD2
		SERPINB7						SYDE2
		SETBP1						SYN3
		SFN						SYPL2
		SFRP4						SYT7
		SH3BGR						TBXAS1
		SLC12A8						TCEA3
		SLC15A5						TENM4
		SLC16A12						TET2
		SLC1A3						TEX14BP
		SLC22A23						TLR12P
		SLC25A23						TMC3
		SLC26A10						TMEM139
		SLC2A14						TMEM14A
		SLC35D1						TMEM174
		SLC35F3						TMEM229A
		SLC39A3						TMEM25
		SLC46A1						TMEM26
		SLC7A5						TMEM86B
		SMIM2.AS1						TMSB15A
		SNN						TOX
		SNX18P12						TOX3
		SP2.AS1						TPMT
		SPATA18						TPRKB
		SPHK1						TRABD2B
		SPINT2						TRDN
		SPNS2						TRIL
		SPNS3						TRPC1
		SPON2						TTC36
		SRM						TXNDC16
		SSC4D						TYSND1
		SSC5D						UBE2U
		SSX2B						UNC5C
		ST13P19						UPP2
		ST13P3						VSTM2A
		ST13P6						VWA1
		ST8SIA6						VWA2
		STAG3L1						VWCE
		STK31						WDR27
		STMN3						XYLB
		SUGCT						XYLT1
		SULF2						ZMYND10
		SUMO2P17						ZNF385B
		SVIL.AS1						ZNF394
		SYN1						ZNF444
		SYNC
		SYNGR2
		SYTL2
		SYTL5
		TAFA3
		TAL1
		TBXA2R
		TCF7
		TDRD6
		TGFB2
		THEGL
		TIMM8B
		TINAGL1
		TM4SF4
		TM7SF3
		TMC4
		TMC5
		TMEM104
		TMEM184A
		TMEM253
		TMEM38A
		TMEM40
		TMEM63B
		TMEM63C
		TNFRSF10C
		TNR
		TOGARAM2
		TP53I3
		TP53TG1
		TP53TG5
		TRAPPC14
		TRIM55
		TRIM73
		TSKU
		TSPAN11
		TSPAN2
		TSPAN7
		TTYH2
		TYMSOS
		UBE2D3.AS1
		UBE2D4
		UBQLN1.AS1
		UCN
		UCP3
		ULBP3
		UQCR11
		USP3.AS1
		USP32P1
		USP32P3
		VSIG1
		VSIR
		VXN
		WNT2B
		XKR4
		YBX3P1
		ZBED5.AS1
		ZDHHC12.DT
		ZNF219
		ZNF385A
		ZNF469
		ZNF79
